# Supplementary material for: The Kröhnke synthesis of benzo[a]indolizines revisited: towards small, red light emitters
Source: Royal Society of Chemistry journal article supplement (doi:10.1039/d2qo00097k), 2022-01-01

## Supporting Information

# The Kröhnke synthesis of benzo[*a*]indolizines revisited: towards small, red light emitters

Jaqueline S. A. Badaro,<sup>a</sup> Beata Koszarna,<sup>a</sup> Manon H. E. Bousquet,<sup>b</sup> Erik Ouellette,<sup>c</sup> Denis Jacquemin,<sup>\*b</sup> and Daniel T. Gryko,<sup>\*a</sup>

<sup>a</sup>*Institute of Organic Chemistry, Polish Academy of Sciences, Kasprzaka 44/52, 01-224 Warsaw, Poland.*

<sup>b</sup>*CEISAM Lab—UMR 6230, CNRS, University of Nantes, Nantes, France.*

<sup>c</sup>*Department of Chemistry, University of California, Berkeley, 420 Latimer Hall, Berkeley, CA, USA.*

<sup>c</sup>*Chemical Sciences Division, Lawrence Berkeley National Laboratory, 1 Cyclotron Road, Berkeley, CA, USA.*

### Table of Contents

|                                                                        |   |
|------------------------------------------------------------------------|---|
| 1. Optimization studies                                                | 2 |
| 2. Crystallographic data of 3bCN                                       | 3 |
| 3. Photophysical measurements                                          | 4 |
| 4. Computational Details                                               | 6 |
| 5. Electrochemical Studies                                             | 7 |
| 6. <sup>1</sup> H NMR and <sup>13</sup> C NMR spectra of new compounds | 9 |

## 1. Optimization studies

According to the two-step approach initially proposed by Kröhnke *et al.* two different bases were required (Scheme 1), however 5 years later the same group published an optimized one-pot protocol (Scheme 1). We considered it to be a promising starting point and we focused on a one-step procedure modifying bases and solvents (Table S1). First, Lewis bases were evaluated in DMSO, but unfortunately the yield was not satisfactory, only ca. 20% (Table 1, entries 2-3). Common Brønsted bases were then investigated, but this strategy was also not efficient enough. In fact, the best result was obtained for Cs<sub>2</sub>CO<sub>3</sub> (entry 1), so we decided to increase its concentration to 4 mmol which allowed to obtain a 56% yield for the desired product **3cCF** (entry 8). Finally, different aprotic polar solvents were evaluated and sulfolane gave the most gratifying result, increasing the yield to 68% (entry 1). Additionally, we tried increasing the temperature and decreasing the reaction time; but both changes did not enhance the yield; in fact, in some cases it resulted in a yield decrease as well as many side-products, so we set on room temperature and 16 h as optimal conditions. Furthermore, the reactivity of reagents having different leaving groups at position 4 of nitroarenes was compared. The reaction was successful not only when 4-chloro-3,5-dinitrobenzotrifluoride was used (68%) but also with 4-fluoro-3,5-dinitrobenzotrifluoride, though with a slight decrease in yield (60%).

**Table S1** First optimization studies of the reaction conditions<sup>a</sup>

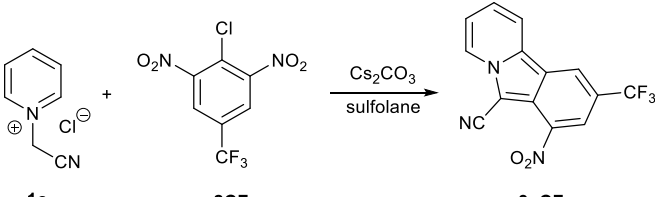

| Entry | Deviation from the standard conditions                                                                              | Yield (%) <sup>a</sup> |
|-------|---------------------------------------------------------------------------------------------------------------------|------------------------|
| 1     | none                                                                                                                | 68                     |
| 2     | DBU and DMSO instead of Cs <sub>2</sub> CO <sub>3</sub> and sulfolane                                               | 17                     |
| 3     | piperidine and DMSO instead of Cs <sub>2</sub> CO <sub>3</sub> and sulfolane                                        | 20                     |
| 4     | K <sub>2</sub> CO <sub>3</sub> and DMSO instead of Cs <sub>2</sub> CO <sub>3</sub> and sulfolane                    | ND                     |
| 5     | KOtBu and DMSO instead of Cs <sub>2</sub> CO <sub>3</sub> and sulfolane                                             | trace                  |
| 6     | cesium pivalate and DMSO instead of Cs <sub>2</sub> CO <sub>3</sub> and sulfolane                                   | 18                     |
| 7     | Cs <sub>2</sub> CO <sub>3</sub> (2 mmol) and DMSO instead of Cs <sub>2</sub> CO <sub>3</sub> (4 mmol) and sulfolane | 25                     |
| 8     | DMSO instead of sulfolane                                                                                           | 56                     |
| 9     | DMPU instead of sulfolane                                                                                           | 44                     |
| 10    | NMP instead of sulfolane                                                                                            | 43                     |

<sup>a</sup> Reaction was performed using 1 mmol of substrates and 4 mmol of base in sulfolane at RT and overnight. ND = not detected.

**Further optimization study.** As stated previously, under the previously optimized conditions, dye **3eCN** was obtained in a considerably lower yield (24%) compared to analogous benzo[*a*]indolizines (Scheme 2). First, various Brønsted bases were evaluated, but in line with the first optimization study the yield was even lower (Table S2, entry 3). At this point, our focus moved towards non-nucleophilic Lewis bases. Among those both *tert*-butylimino-tri(pyrrolidino) phosphorane (BTPP) and tetramethylguanidine (TMG) gave better yields (Table S2, entries 1, 5 and 6), BTPP being the best choice. Consistent with the former study, an increase in temperature and a variation in reaction time did not enhance reactivity.

**Table S2** Second optimization studies of the reaction conditions<sup>a</sup>

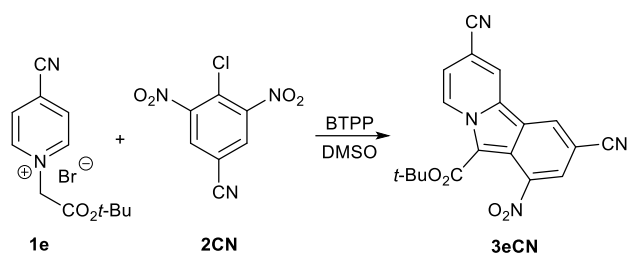

| Entry | Deviation from the standard conditions                   | Yield (%) <sup>a</sup> |
|-------|----------------------------------------------------------|------------------------|
| 1     | none                                                     | 58                     |
| 2     | Cs <sub>2</sub> CO <sub>3</sub> (4 mmol) instead of BTTP | 24                     |
| 3     | KOAc instead of BTTP                                     | 15                     |
| 4     | piperidine (2 mmol) instead of BTTP                      | Trace                  |
| 5     | TMG (2.5 mmol) instead of BTTP                           | 40                     |
| 6     | TMG (4 mmol) instead of BTTP                             | Trace                  |

<sup>a</sup> Reaction was performed using 1 mmol of substrate and 4 mmol of P1-*t*-Bu-tris (tetramethylene) BTTP = P1-*t*-Bu-tris(tetramethylene)

## 2. Crystallographic data of 3bCN

Table S1: Summary of crystal data for 3bCN

|                                         |                                                                                         |
|-----------------------------------------|-----------------------------------------------------------------------------------------|
| <b>Chemical formula</b>                 | C <sub>18</sub> H <sub>8</sub> N <sub>4</sub> O <sub>2</sub>                            |
| <b>Molecular weight</b>                 | 312.28 g/mol                                                                            |
| <b>Crystal size</b>                     | 0.08 × 0.04 × 0.04 mm                                                                   |
| <b>Temperature</b>                      | 100 K                                                                                   |
| <b>Wavelength</b>                       | 0.72880 Å                                                                               |
| <b>Crystal system</b>                   | monoclinic                                                                              |
| <b>Space Group</b>                      | P2 <sub>1</sub> /n                                                                      |
| <b>Unit cell dimension</b>              | a/Å 10.6574(7)<br>b/Å 11.6570(8)<br>c/Å 10.8159(7)<br>α/° 90<br>β/° 98.605(3)<br>γ/° 90 |
| <b>Volume</b>                           | 1328.57(15) Å <sup>3</sup>                                                              |
| <b>Z</b>                                | 4                                                                                       |
| <b>Diffractometer</b>                   | Bruker D8 with PHOTON-II CPAD detector                                                  |
| <b>Radiation Source</b>                 | synchrotron (λ = 0.7288)                                                                |
| <b>Reflections collected</b>            | 3319                                                                                    |
| <b>Independent reflections</b>          | 3319 [R <sub>int</sub> = ?, R <sub>sigma</sub> = 0.0571]                                |
| <b>Tmin, Tmax</b>                       | 0.630, 0.746                                                                            |
| <b>Absorption correction</b>            | multi-scan                                                                              |
| <b>Refinement method</b>                | SHELXL using Least Squares minimisation                                                 |
| <b>Data / Restraints / parameters</b>   | 3319/0/218                                                                              |
| <b>Goodness-of-fit on F<sup>2</sup></b> | 1.074                                                                                   |
| <b>Final R indices</b>                  | R <sub>1</sub> 0.0508 (I > 2σ(I))<br>R <sub>2</sub> 0.1401                              |

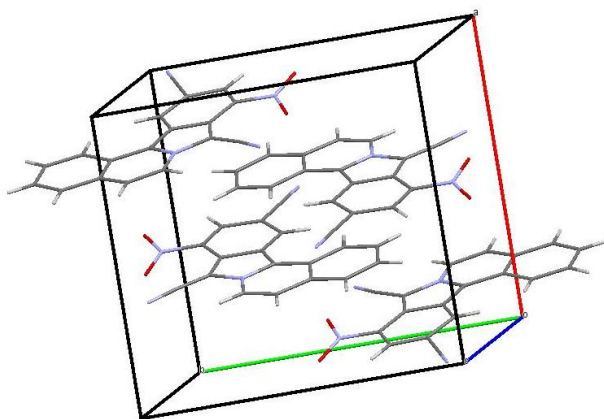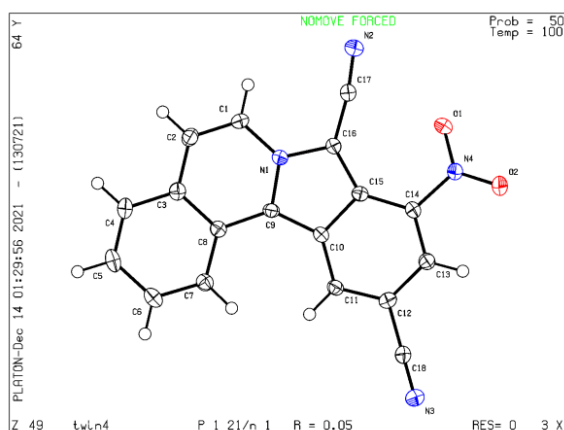

Figure S1: Packing diagram of crystals in elementary cell and thermal ellipsoid plot with 50% probability level of ellipsoid contour

### 3. Photophysical measurements

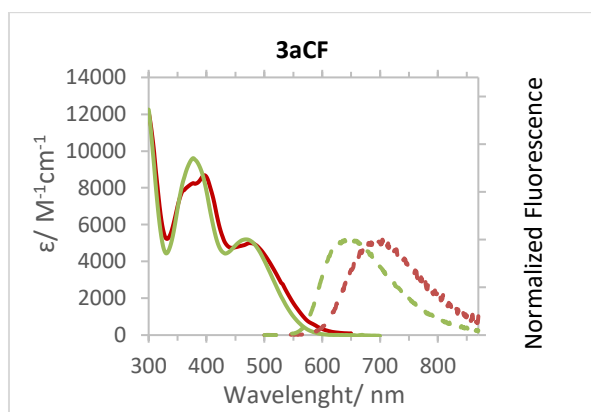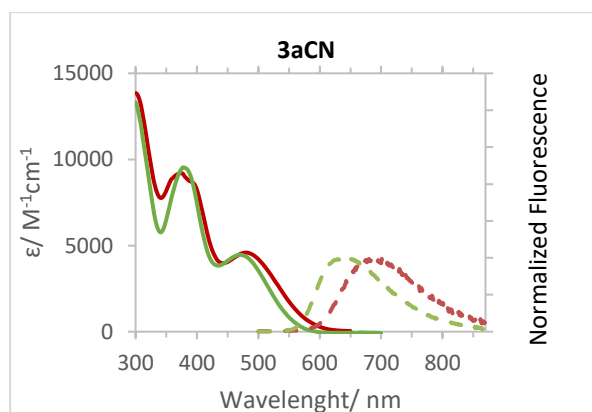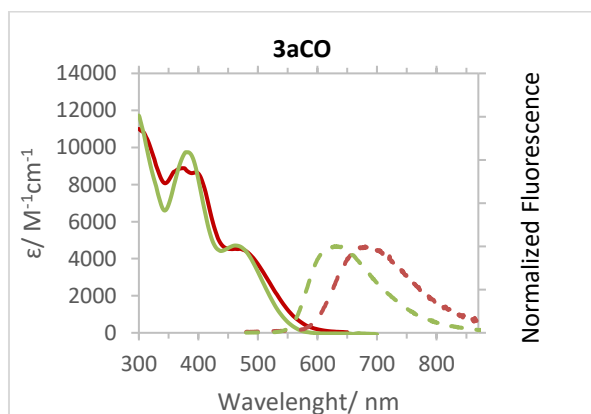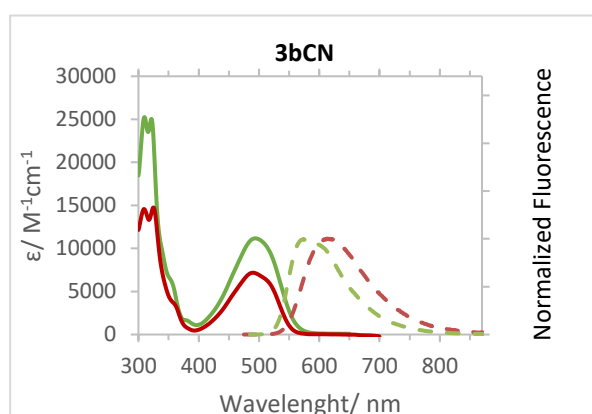

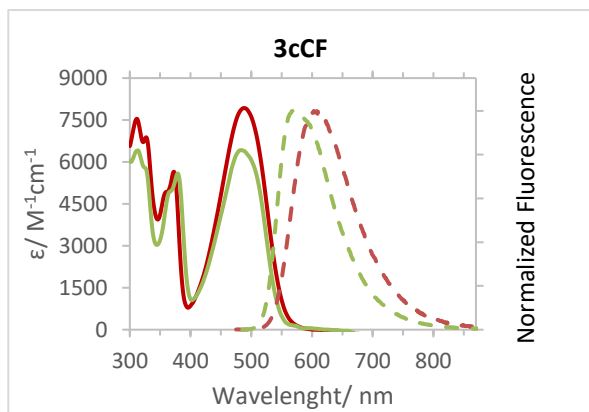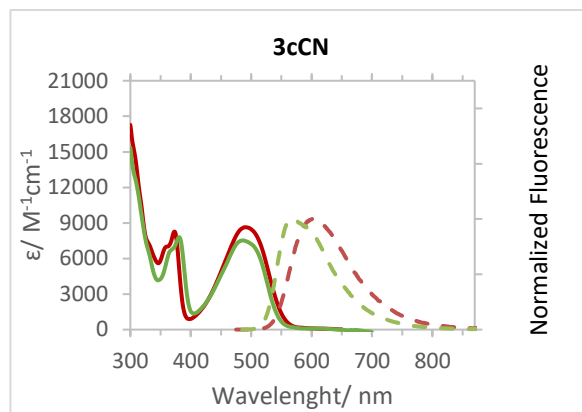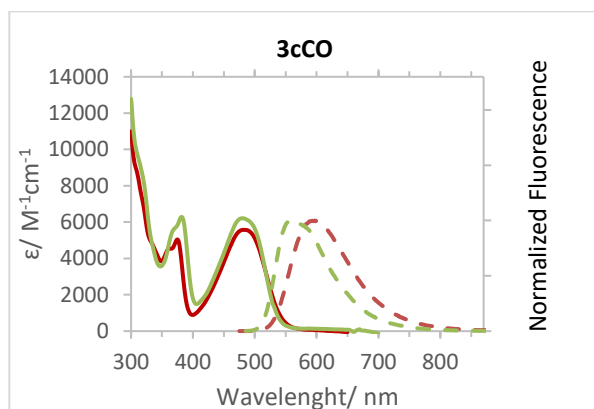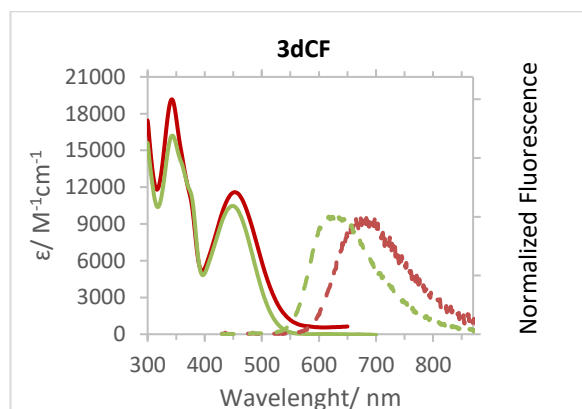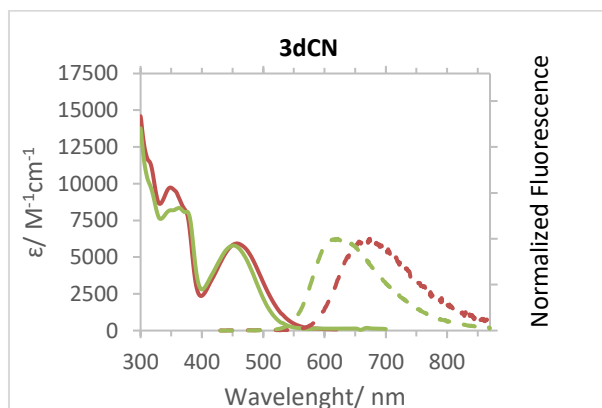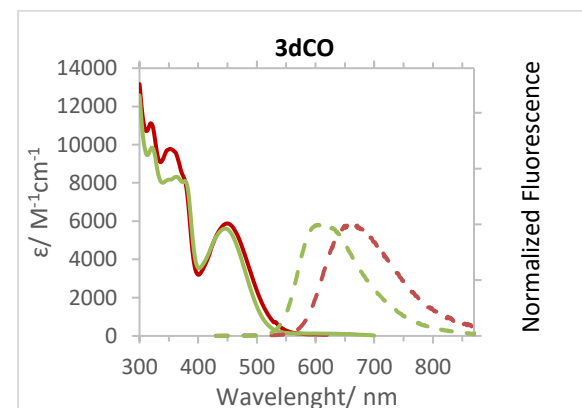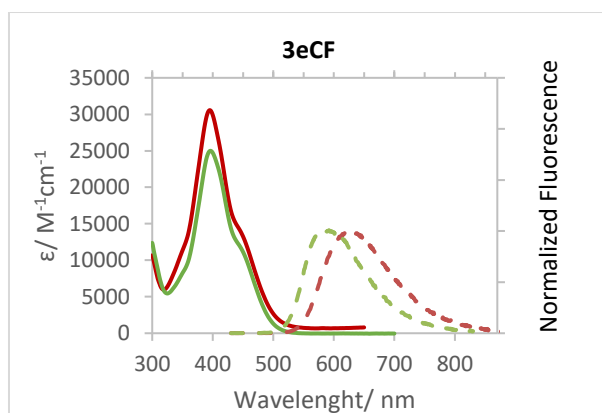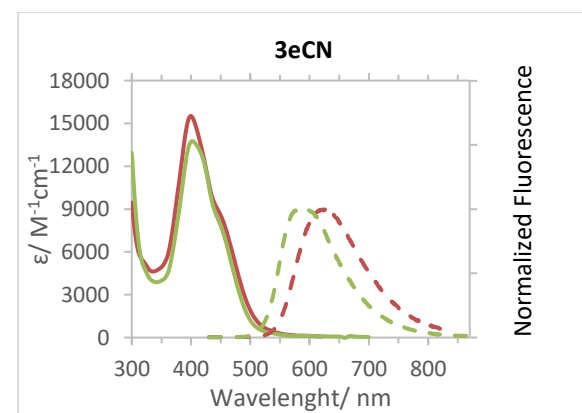

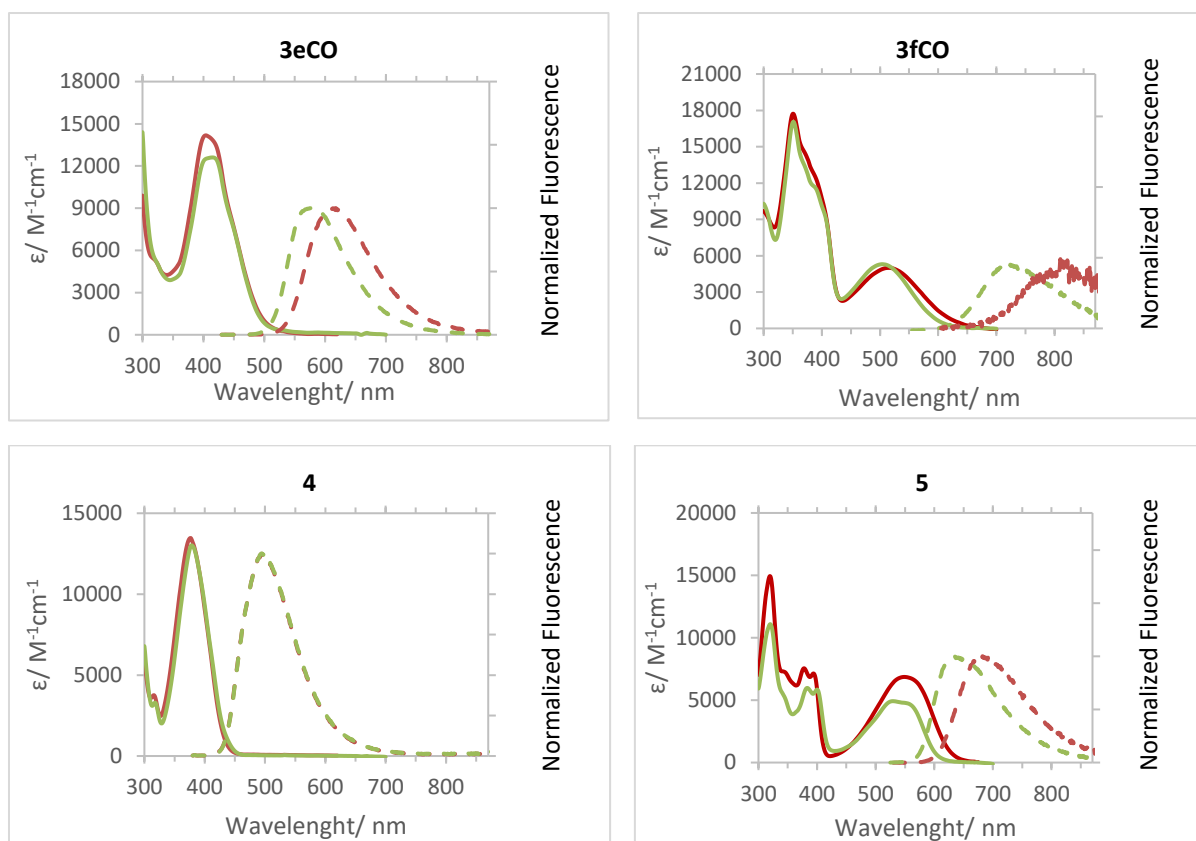

Figure S2: Absorption (solid) and Emission (dashed) of compounds in DCM (red) and Toluene (green)

#### 4. Computational Details

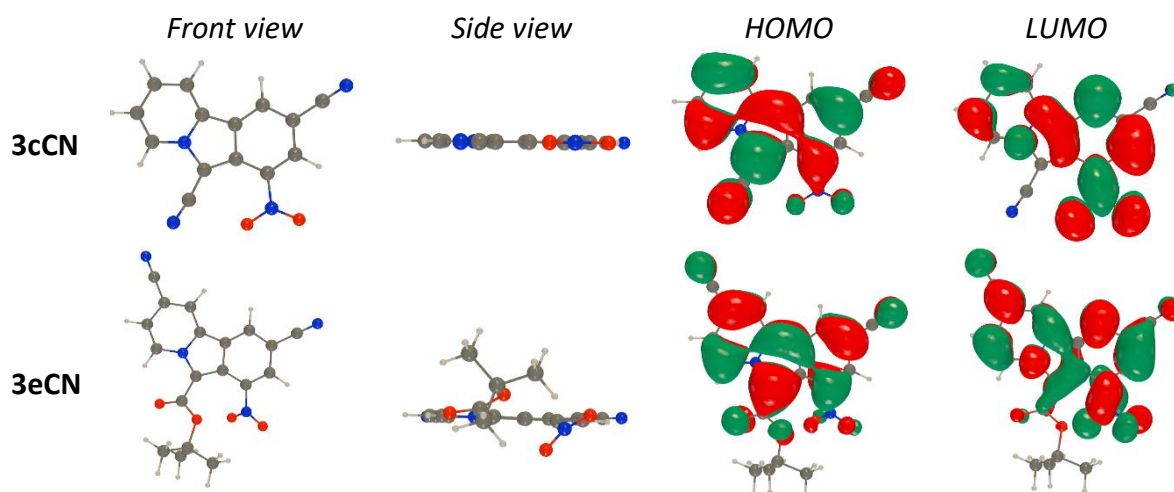

Figure S3: Representation of the optimal ground-state geometries of **3cCN** and **3eCN** in two views, together with the corresponding frontier orbitals. Note the clear twist of the groups at positions 6 and 7 due to the steric clash in **3eCN**

XYZ geometries are available as a separate SI file, in which GS indicate the (DFT) ground-state geometries and ES the (TD-DFT) excited-state geometries.

## 5. Electrochemical Studies

Cyclic voltammograms of compounds (1 mg/mL) were measured at 20 °C, under argon atmosphere, in deoxygenated 0.1 M solutions of tetrabutylammonium perchlorate in anhydrous dichloromethane. A glassy carbon working electrode, a Ag/AgCl / NaCl (sat) reference electrode s, and auxiliary platinum wire were used, while the scan rate was  $\nu = 100 \text{ mV}\times\text{s}^{-1}$ . All values of  $E$  [V] are reported with respect to  $\text{Fc}^+/\text{Fc}$  redox potential.

### 3dCN

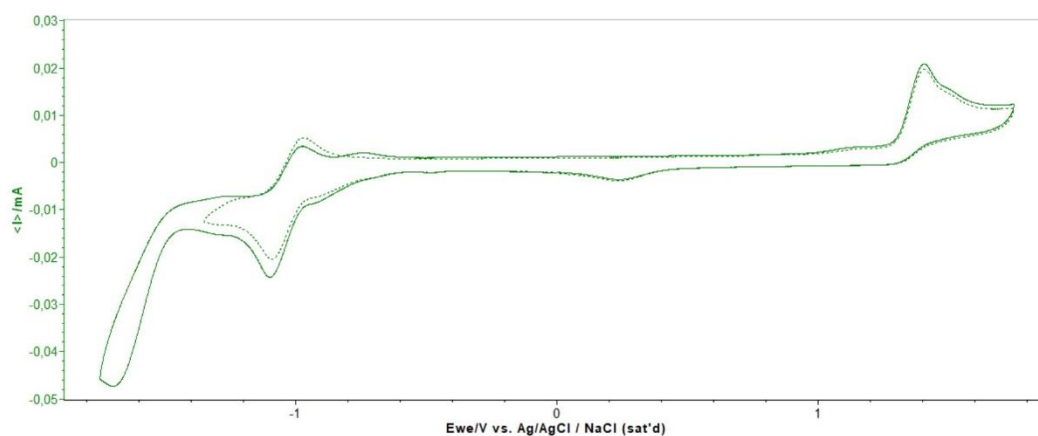

### 3fCO

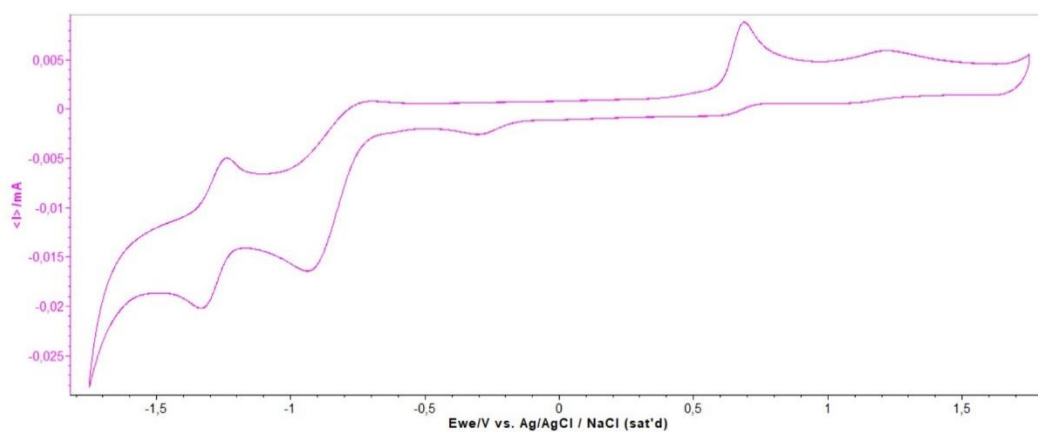

### 3aCF

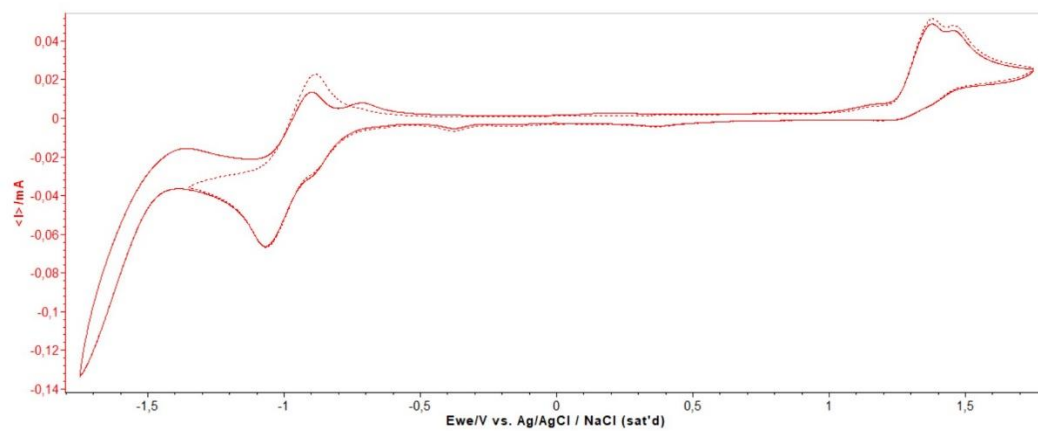

### 3cCN

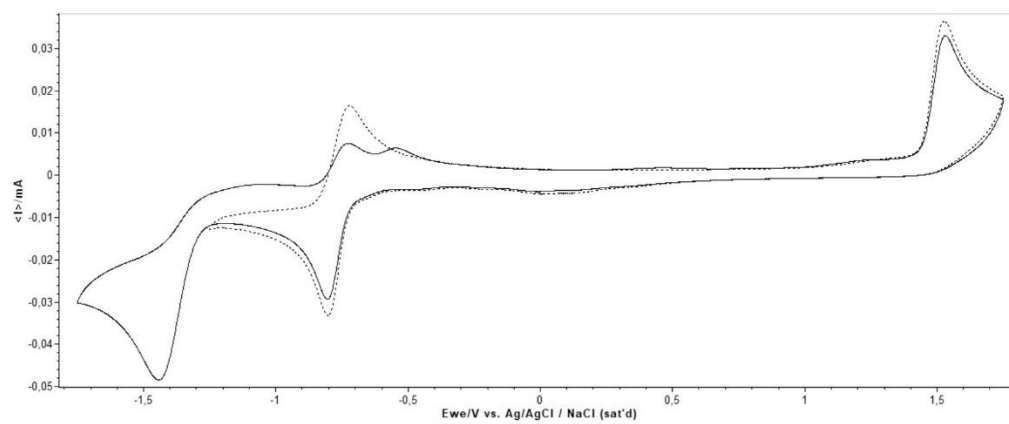

### 3eCN



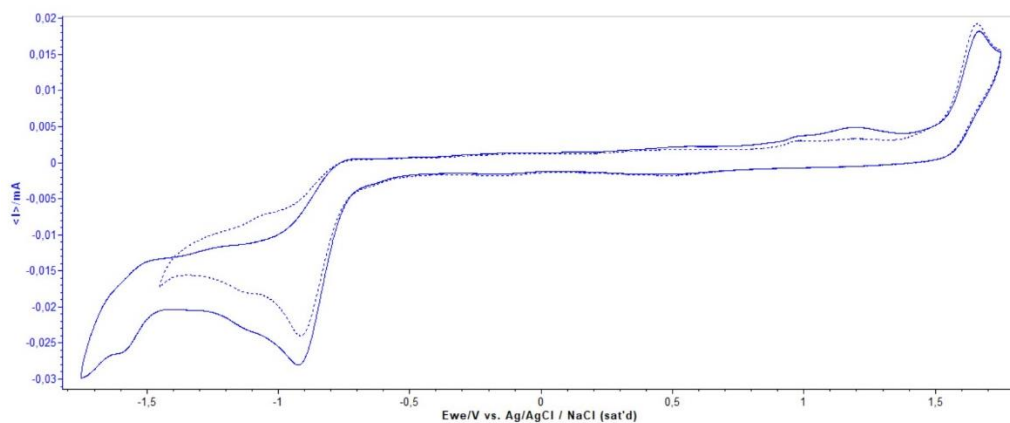

Figure S4: Cyclic voltammograms of compounds

## 6. $^1\text{H}$ NMR and $^{13}\text{C}$ NMR spectra of new compounds

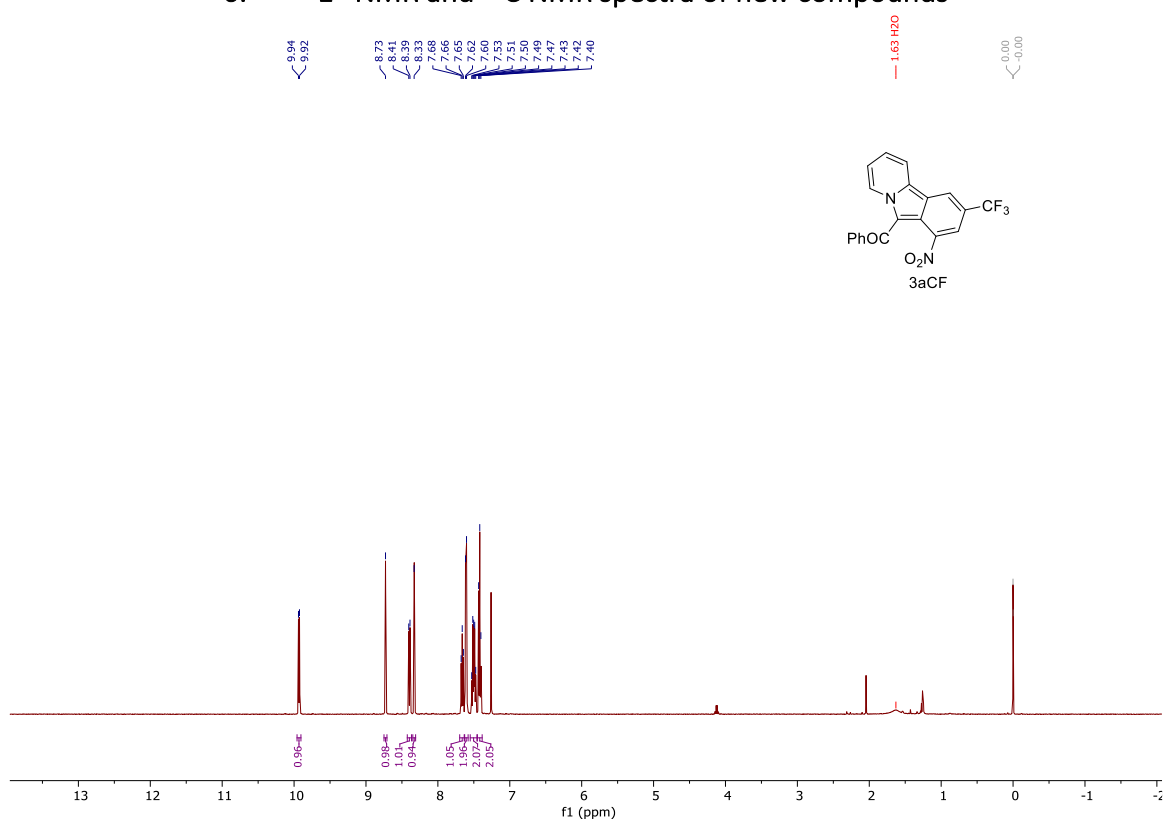

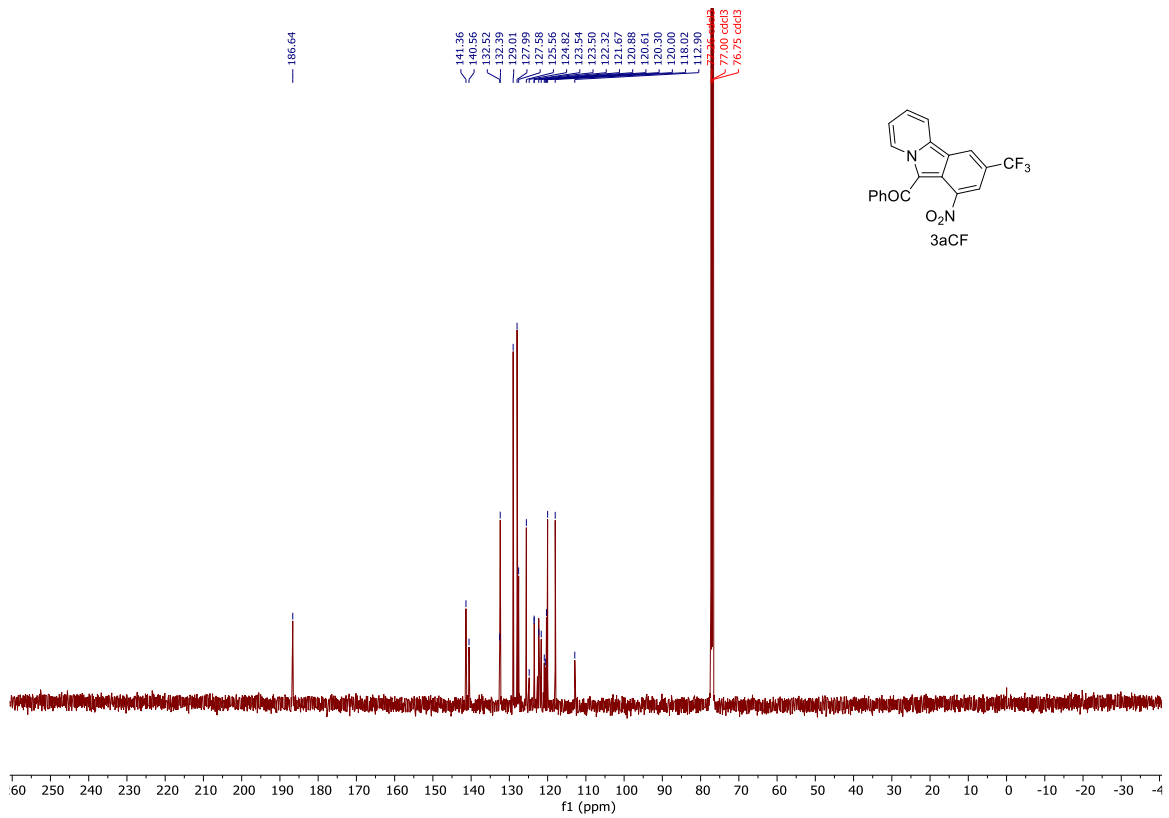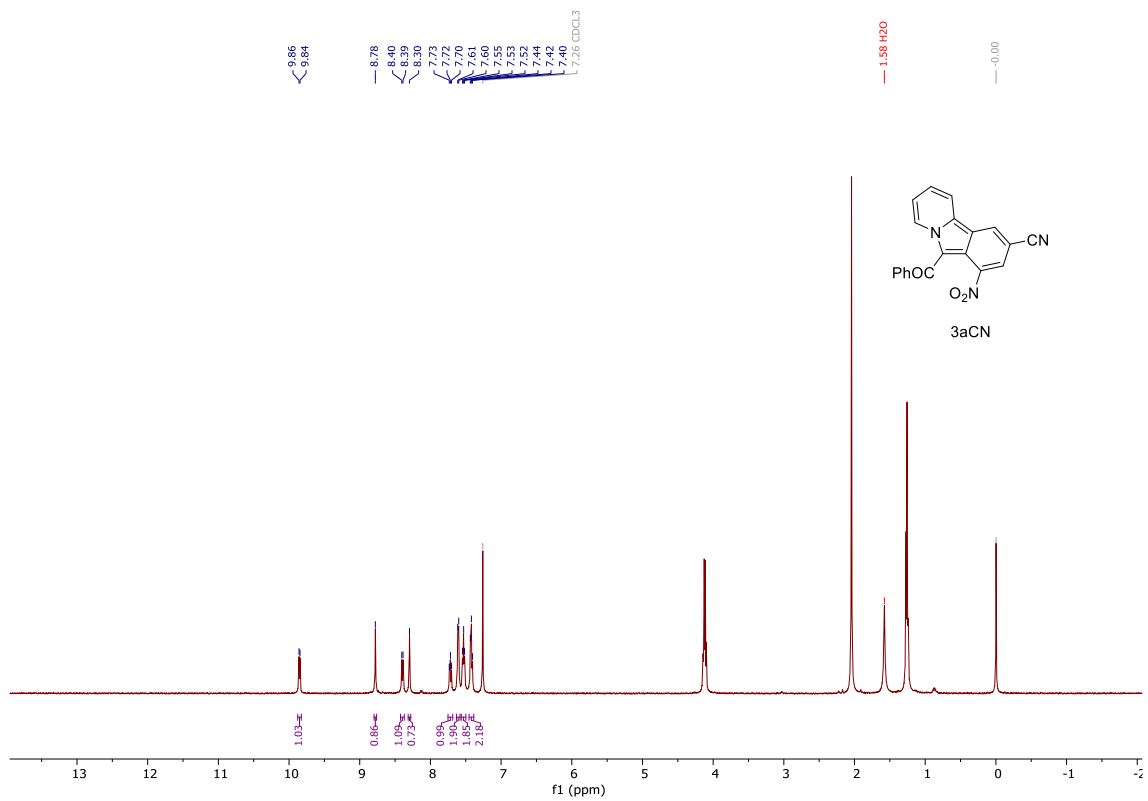

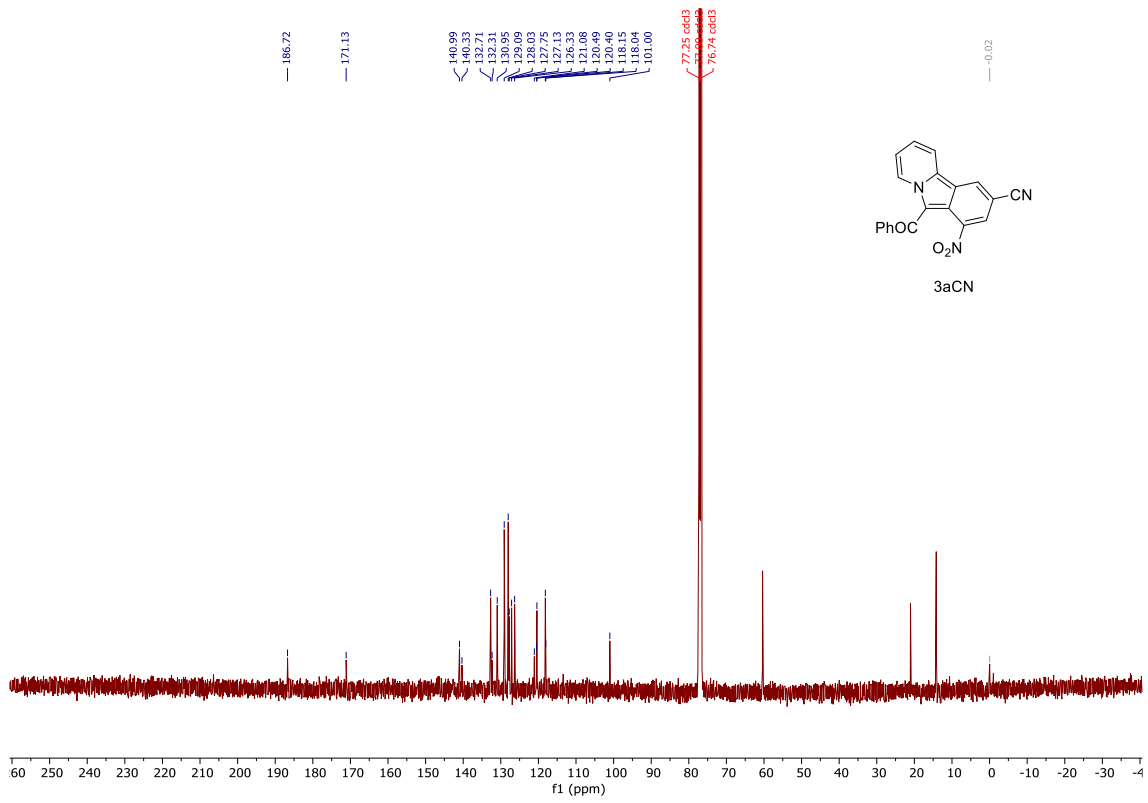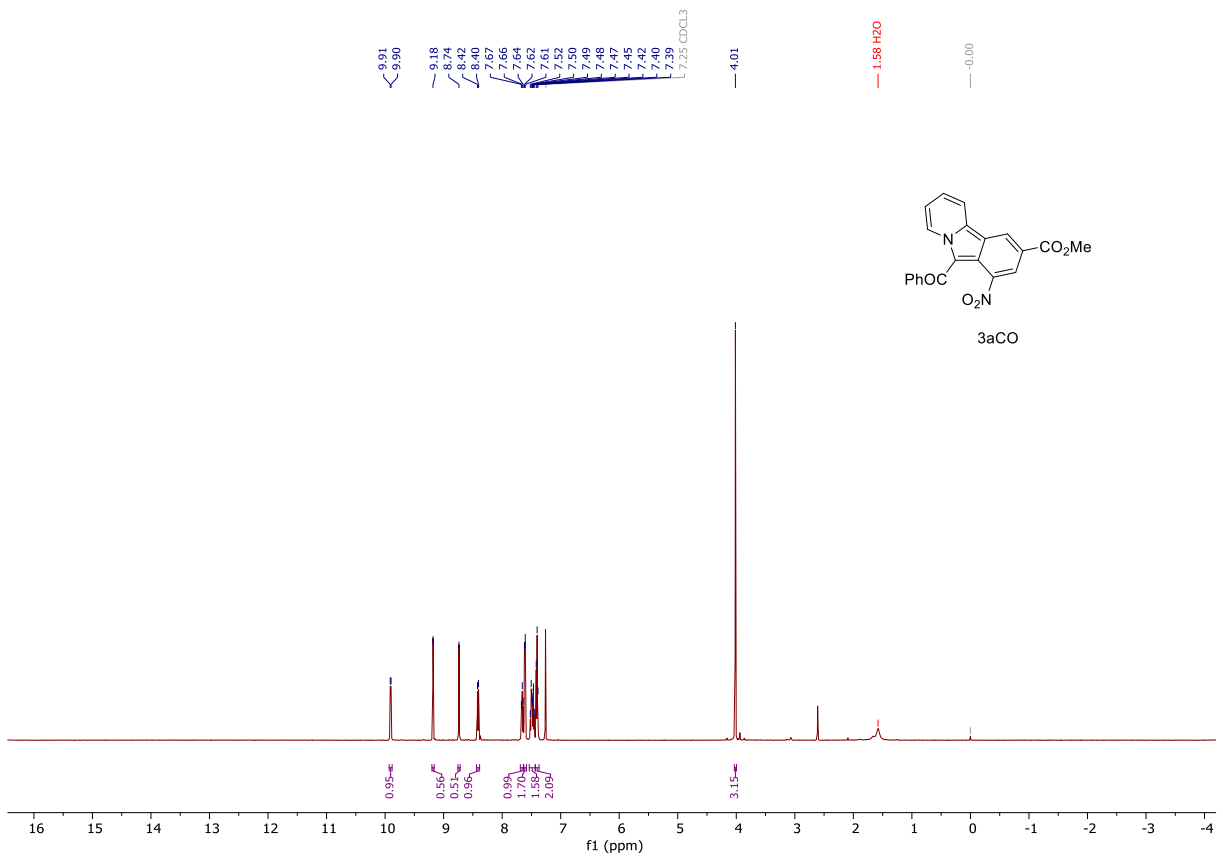

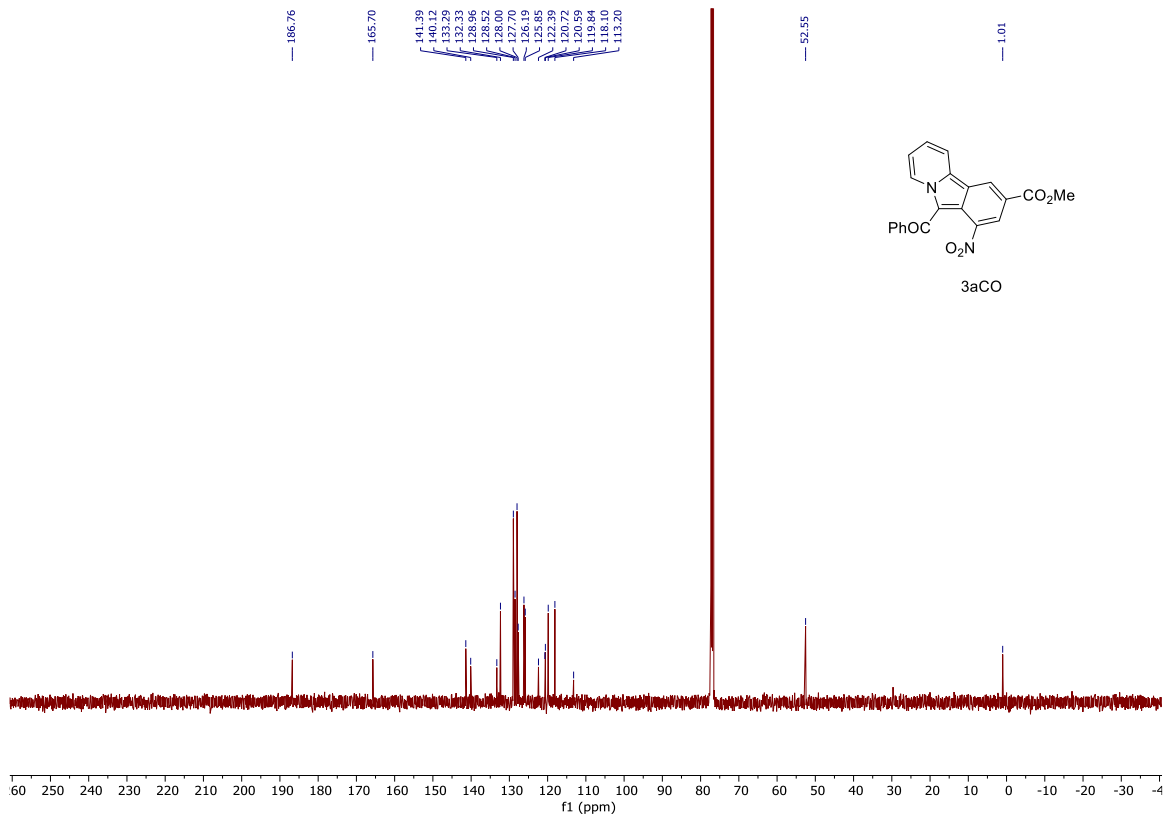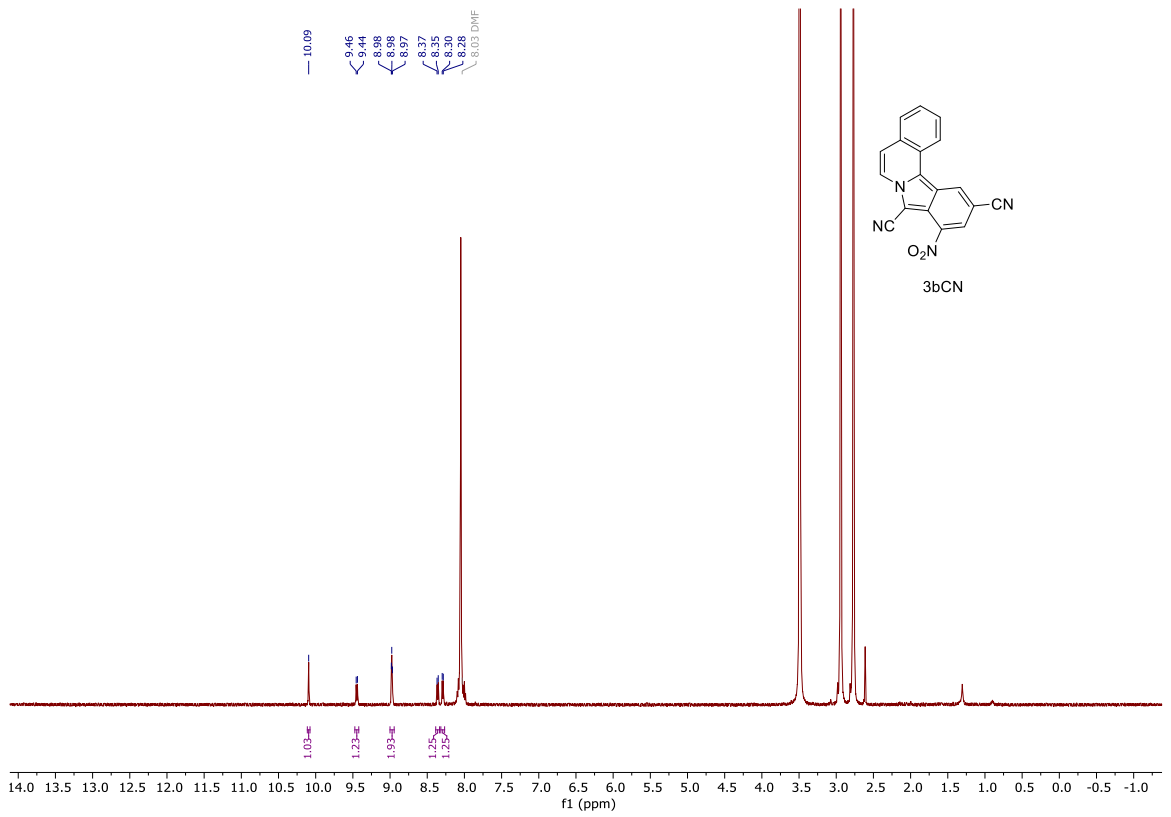

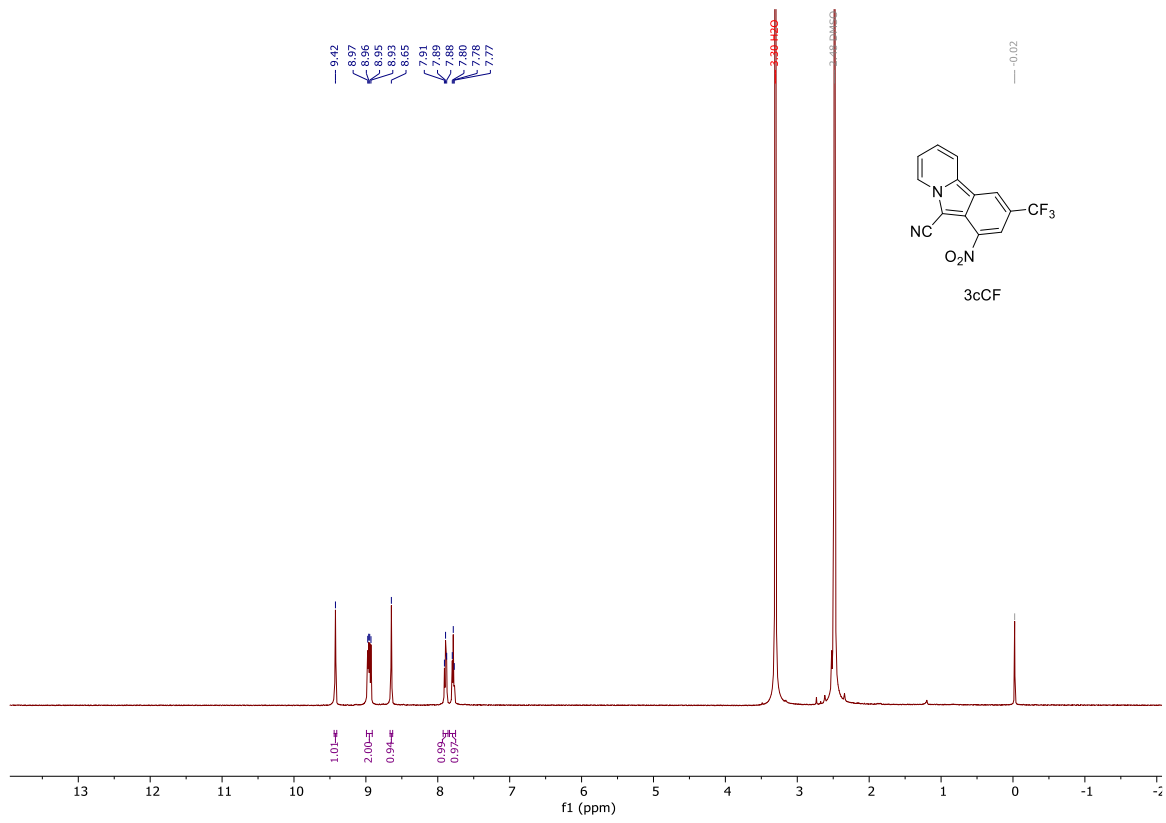

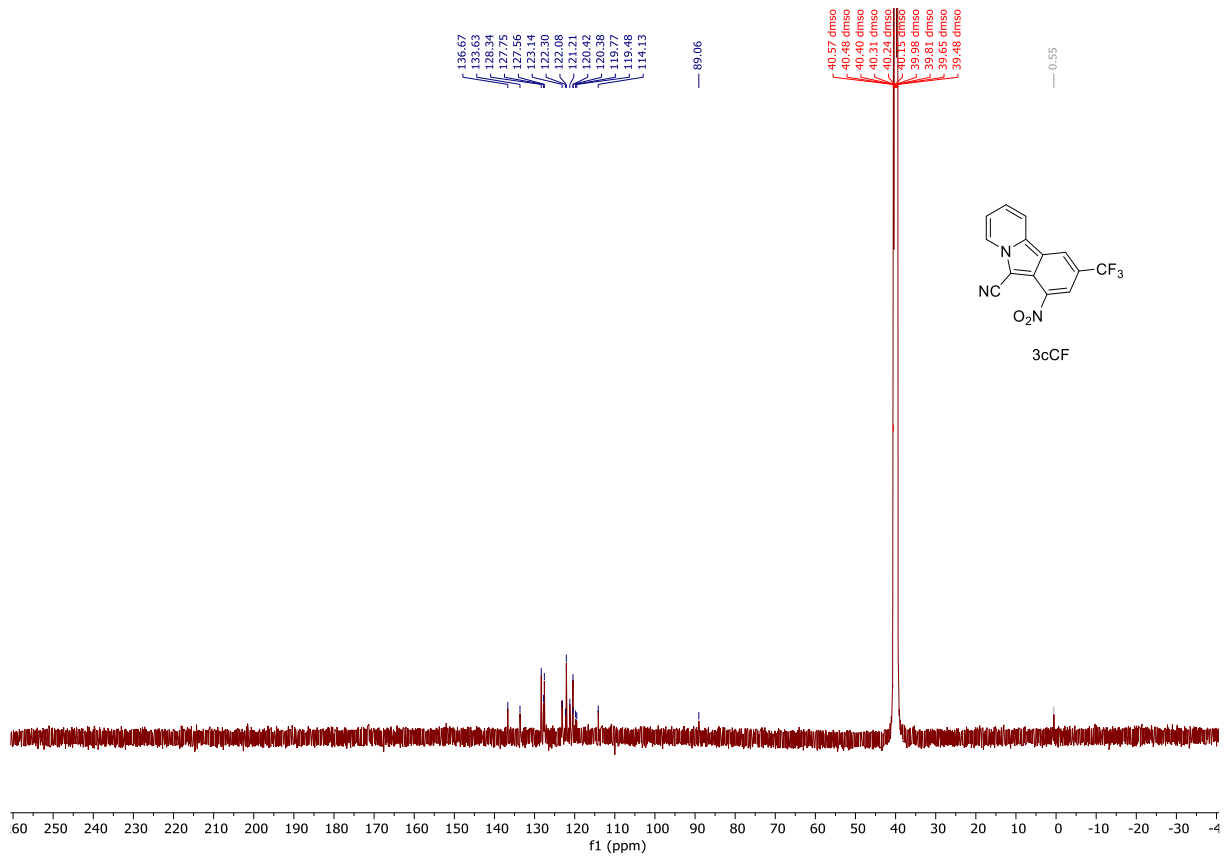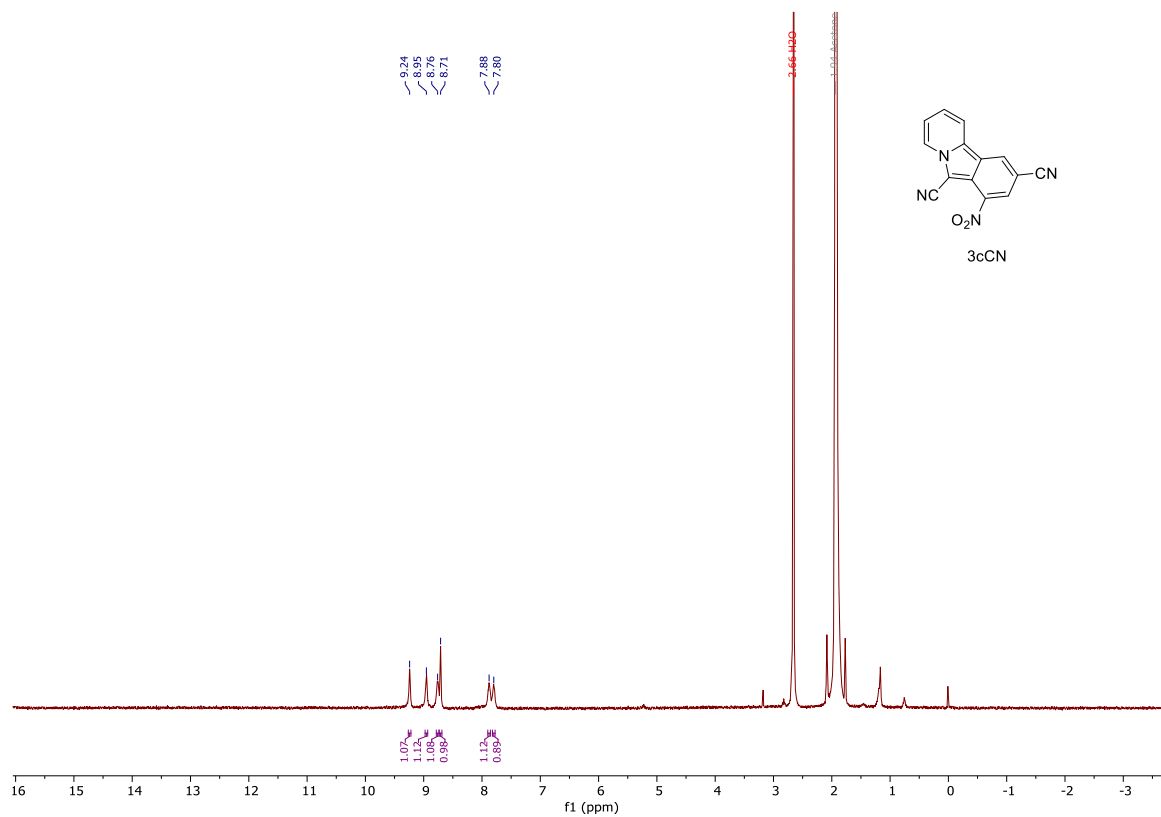

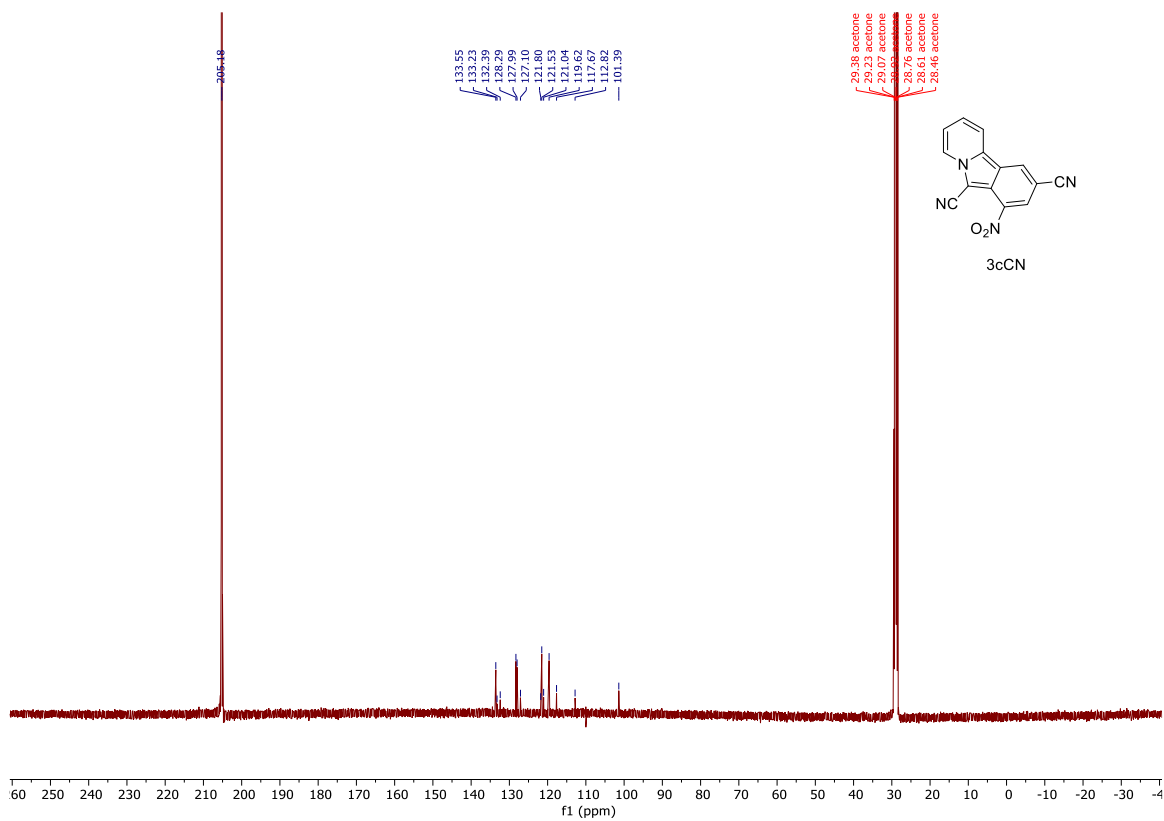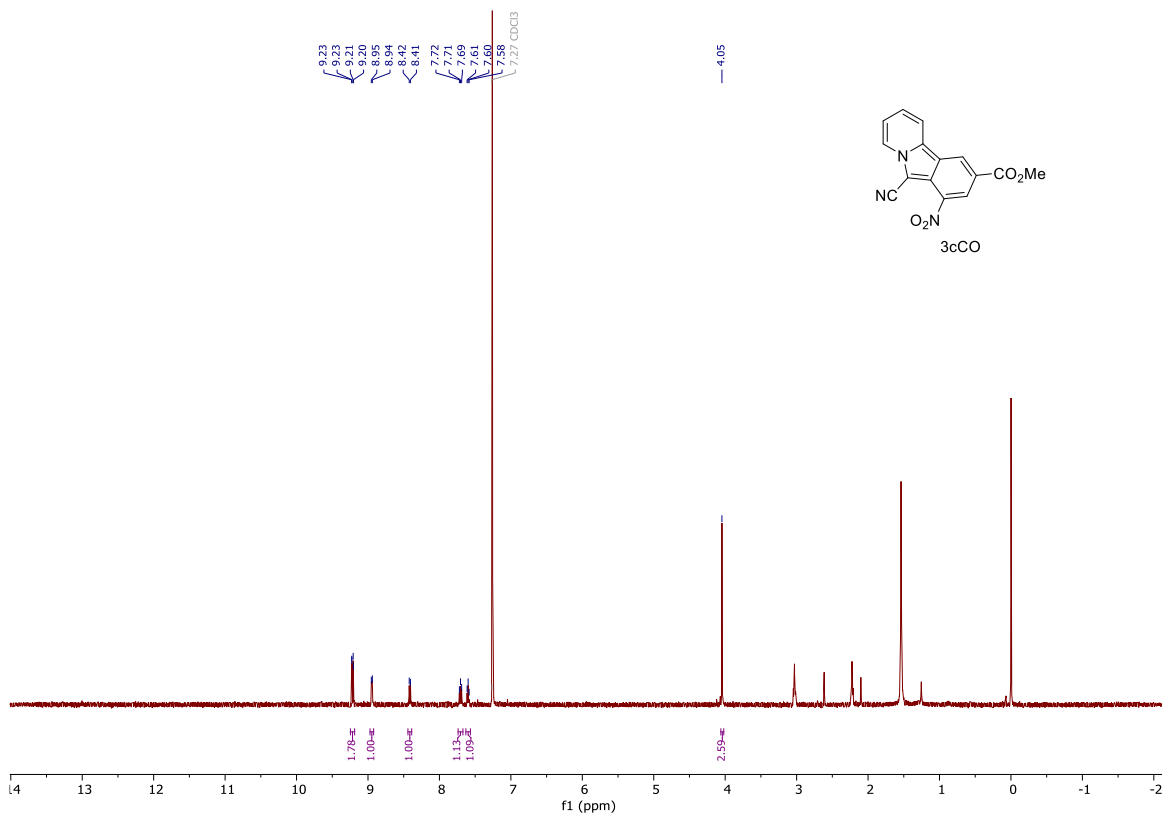

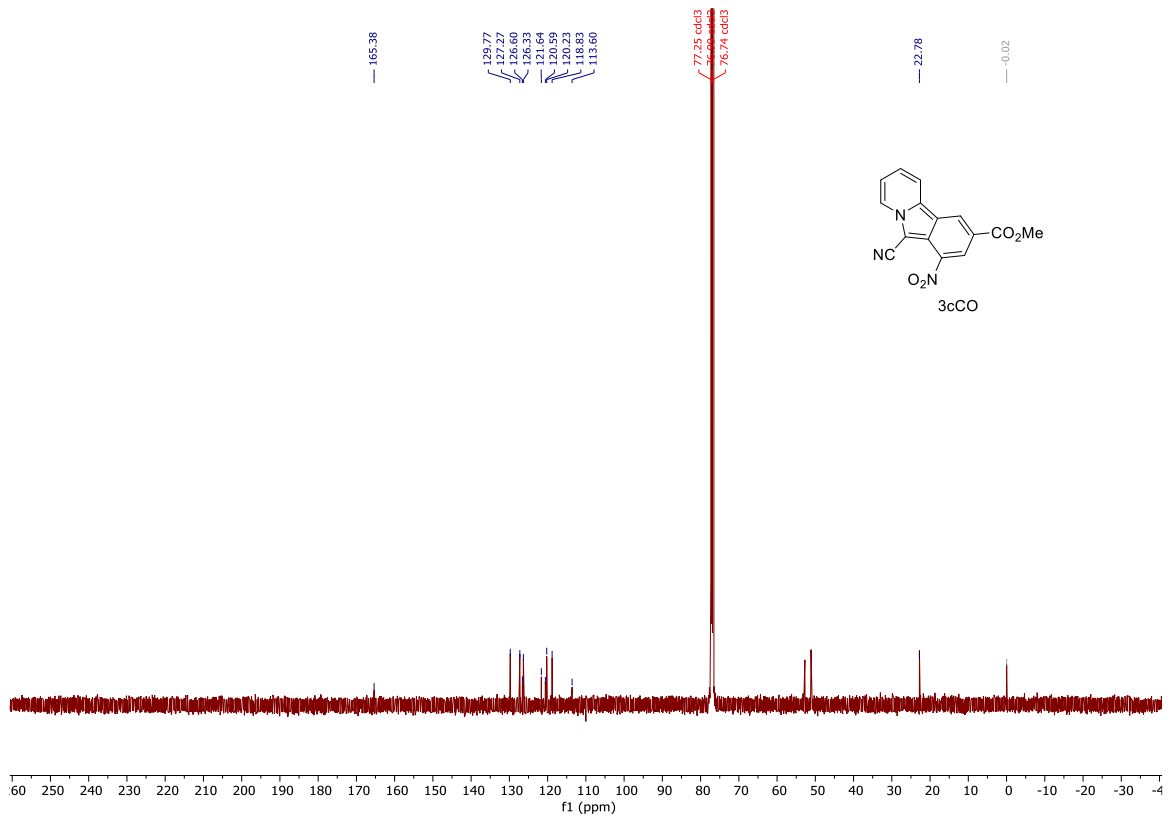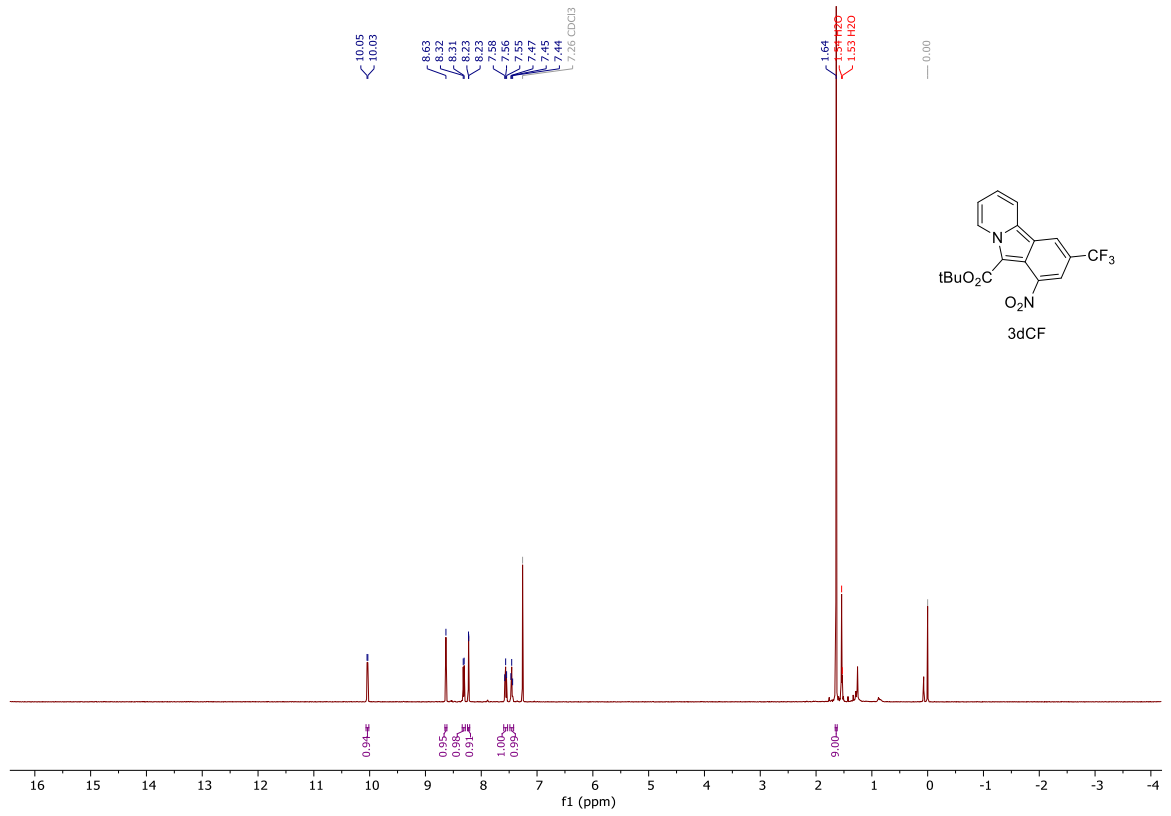



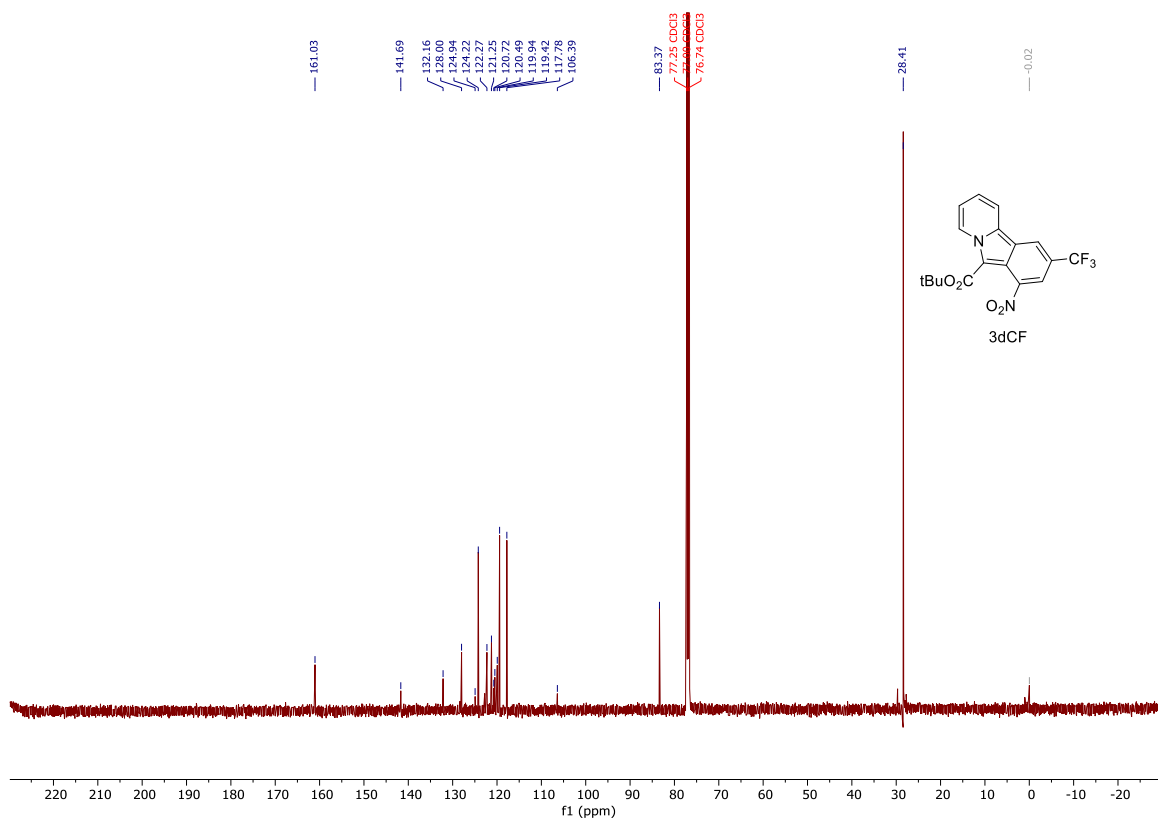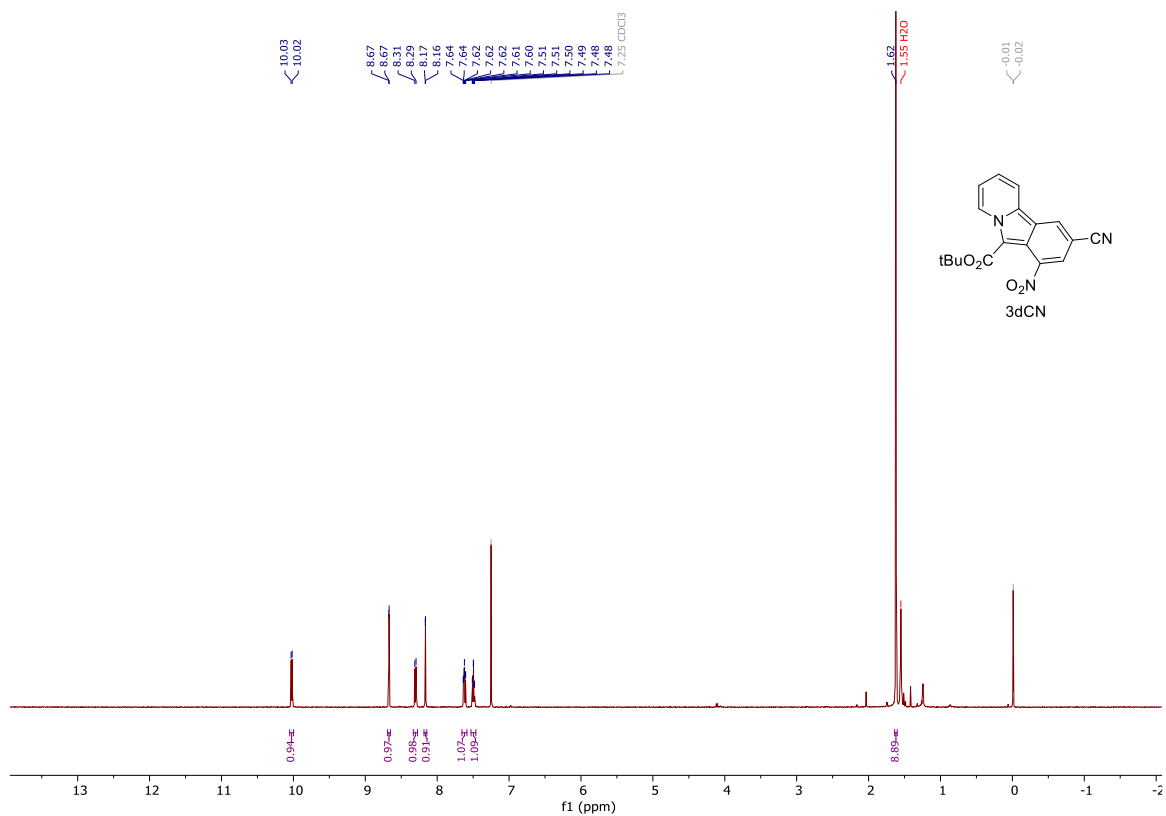

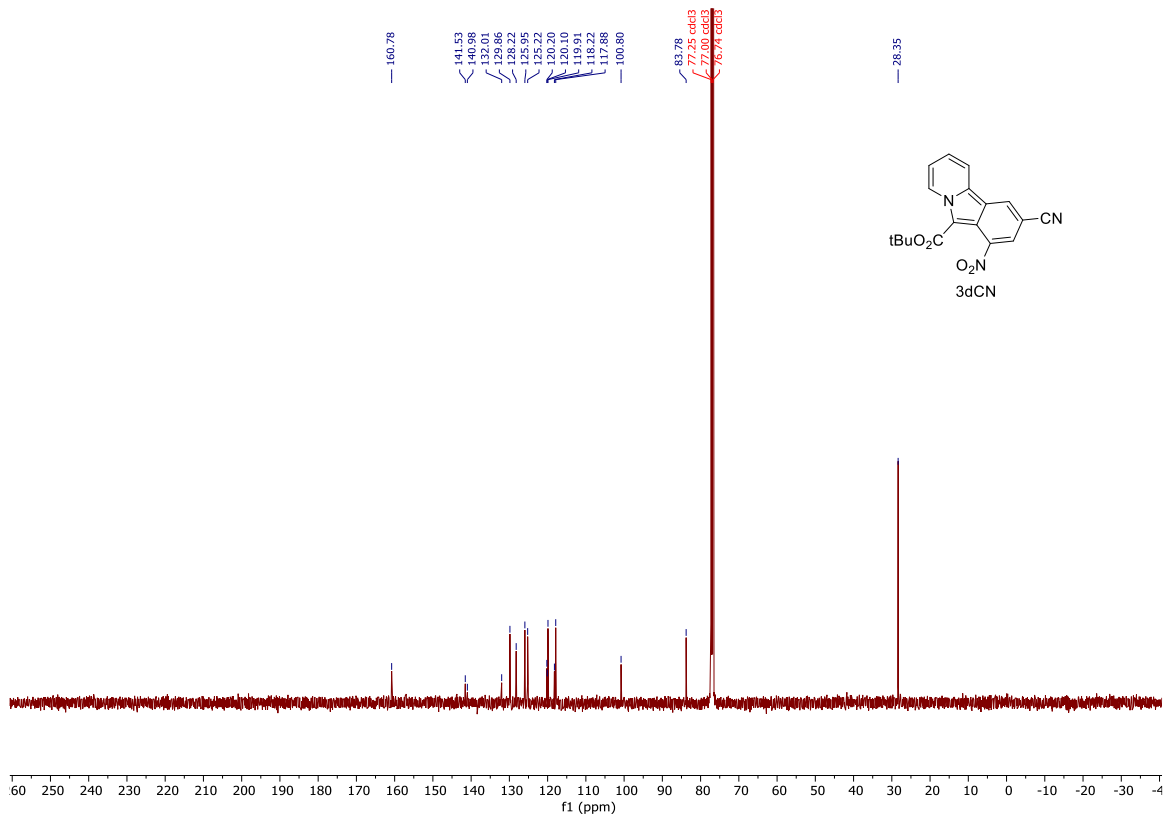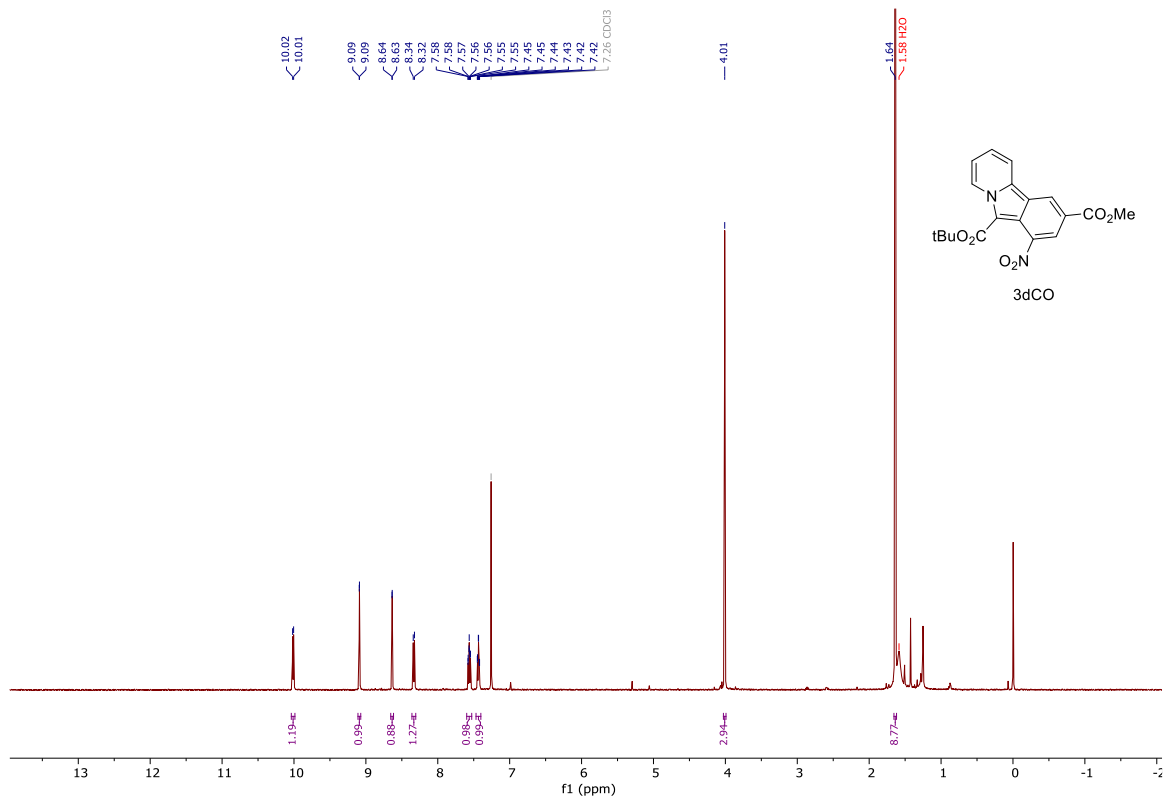

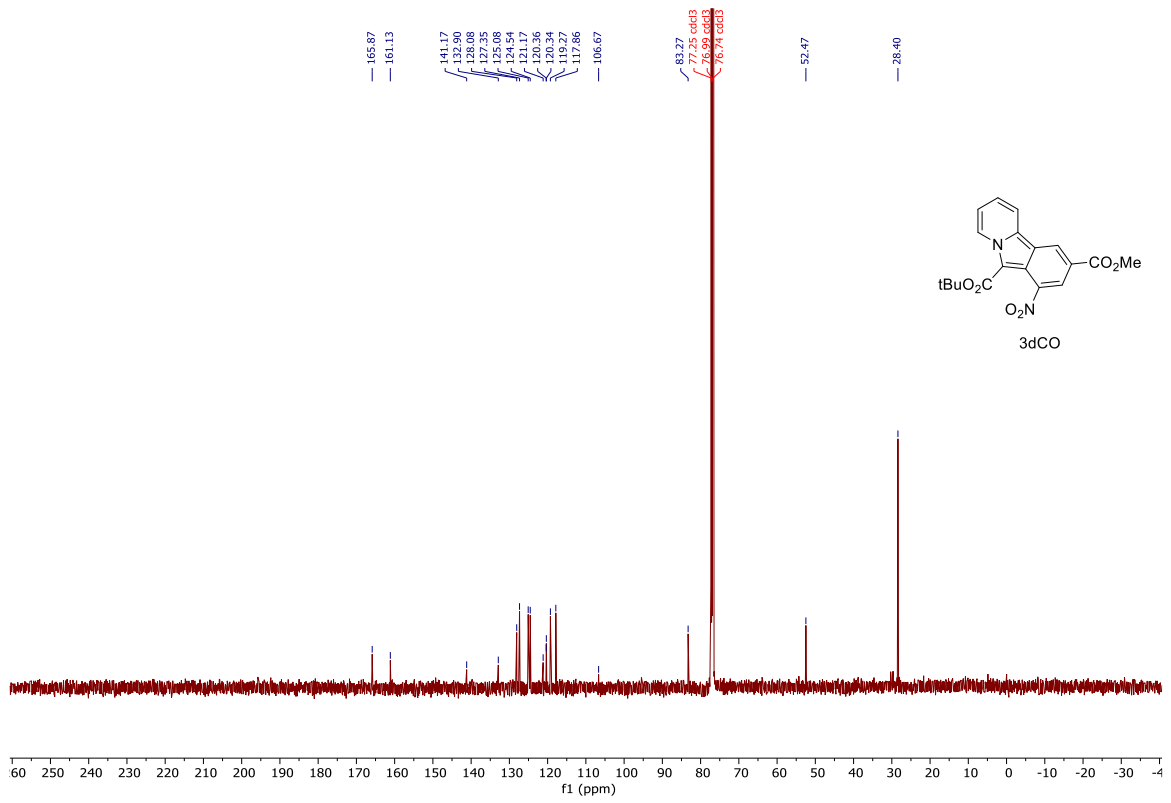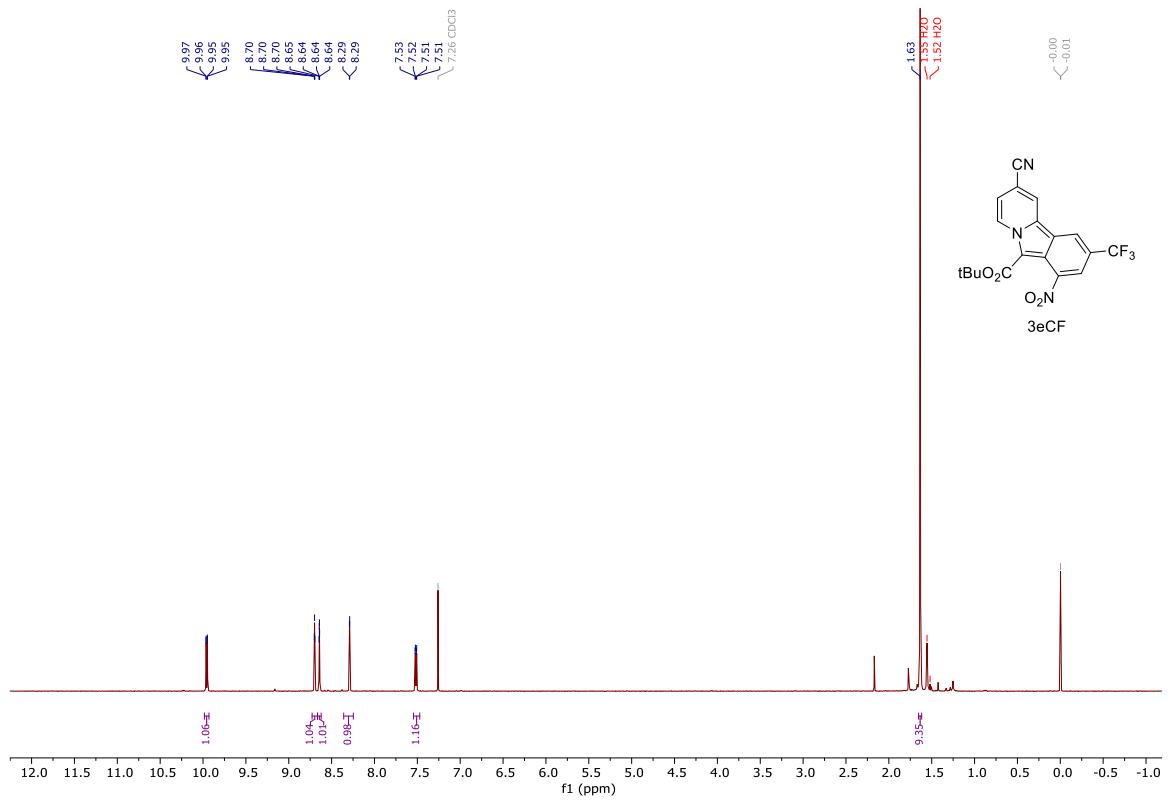

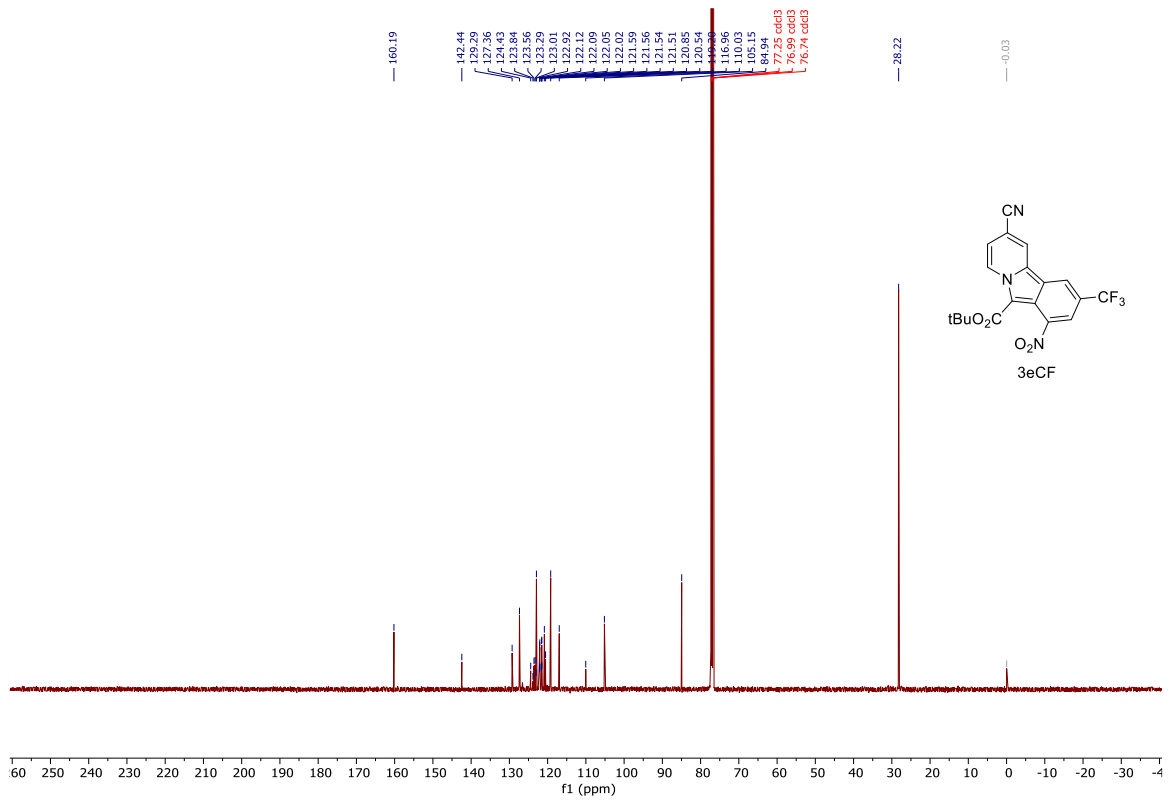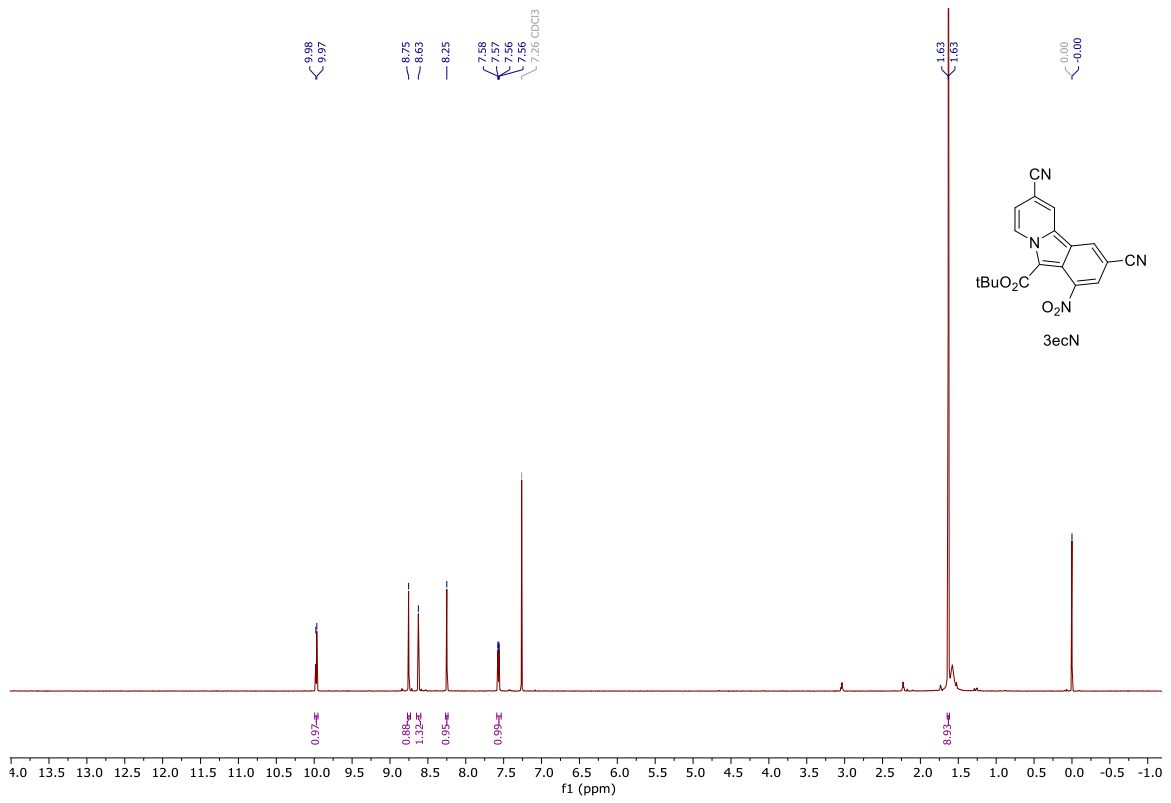

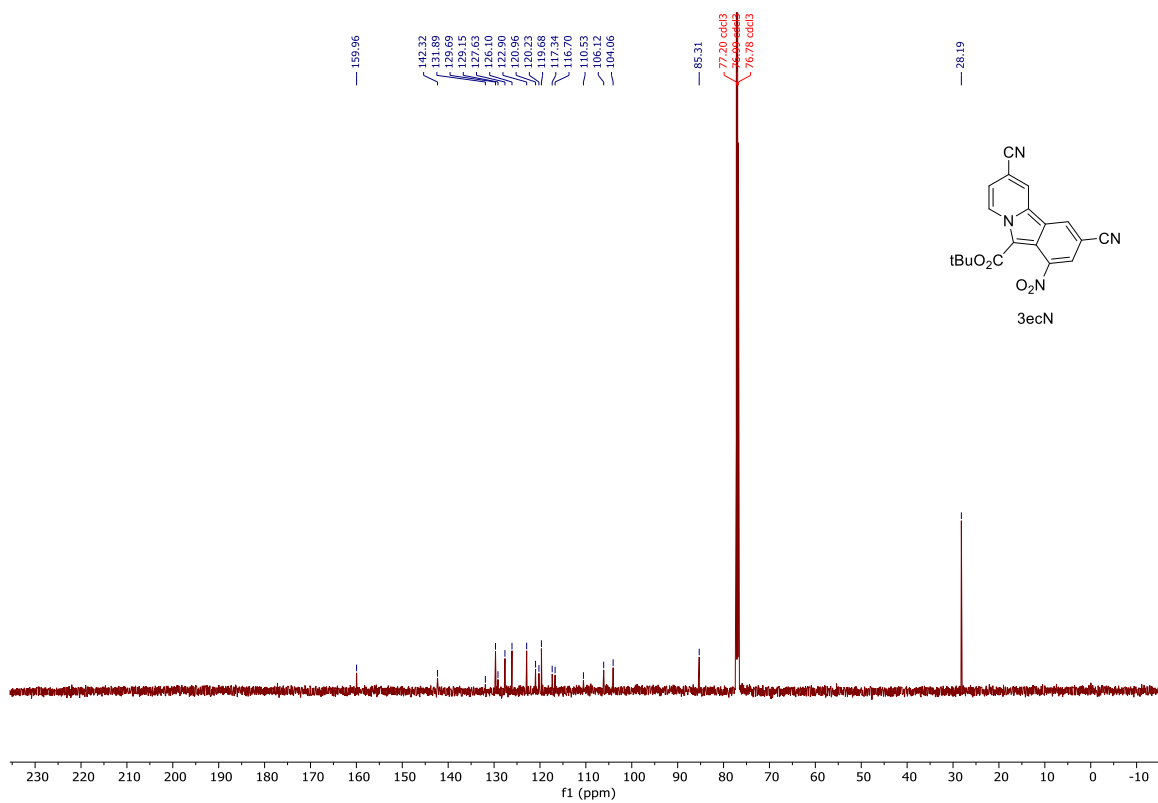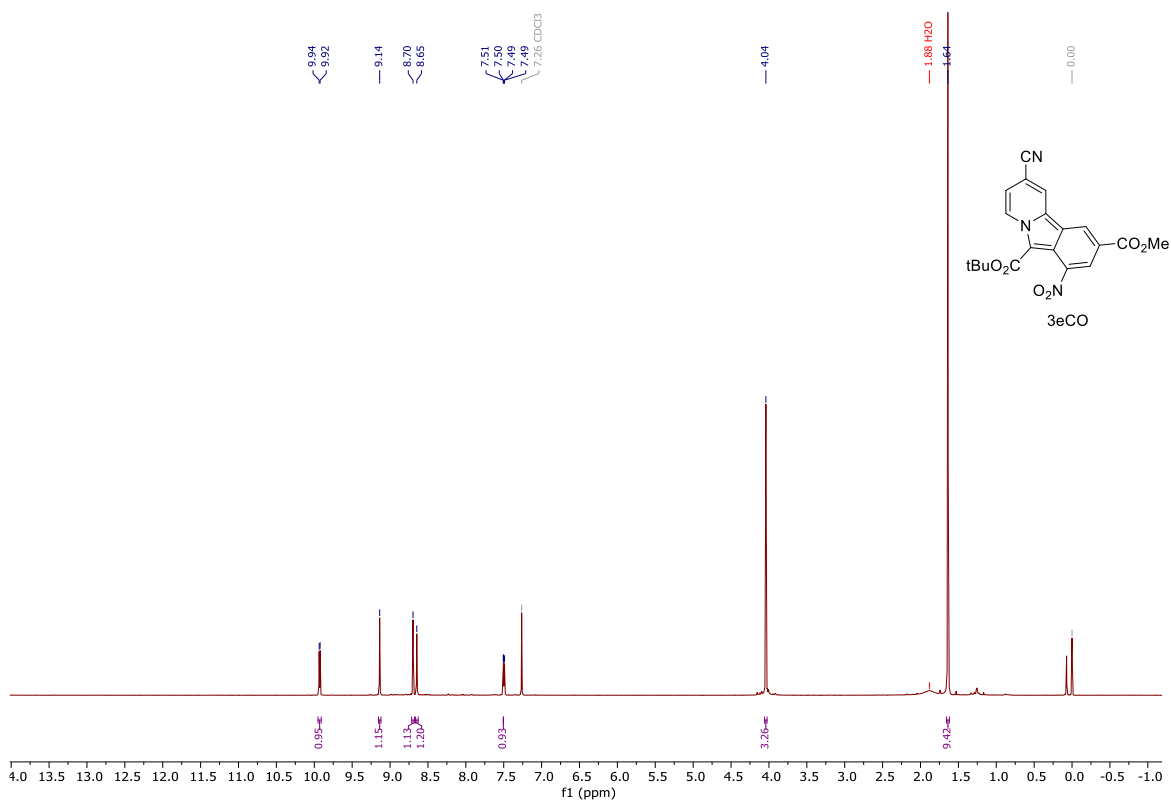

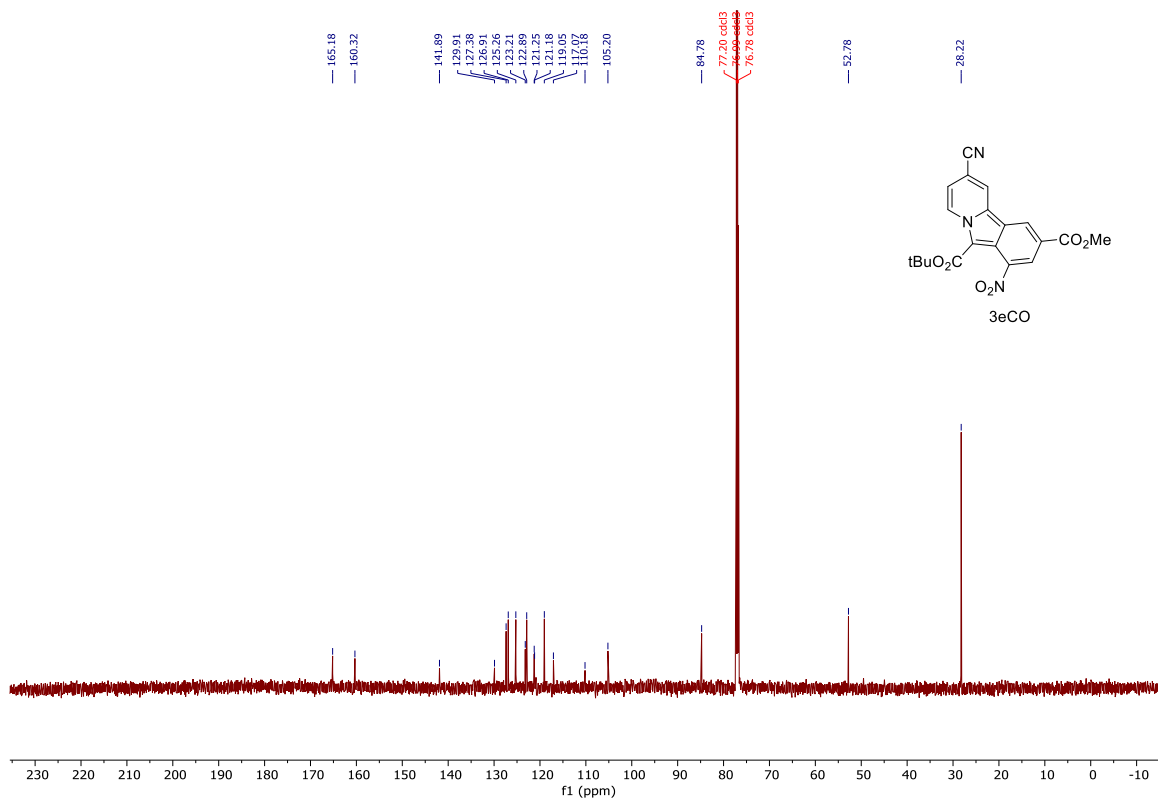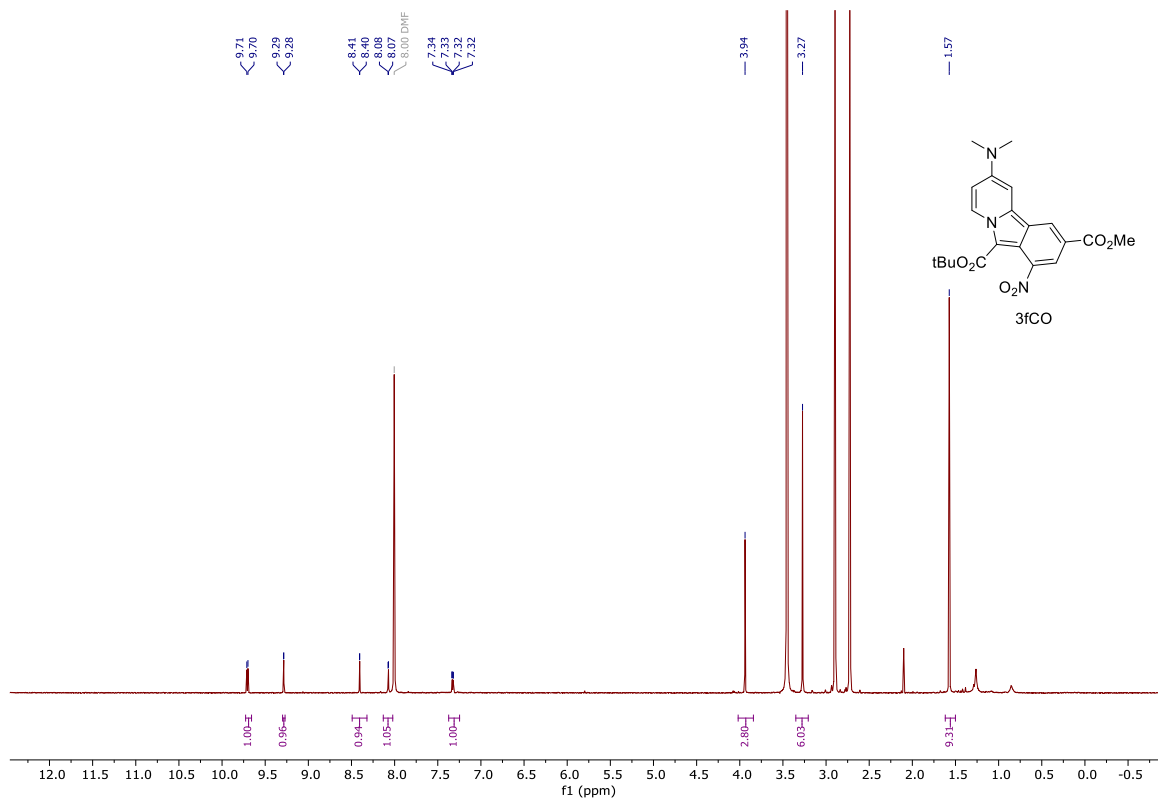

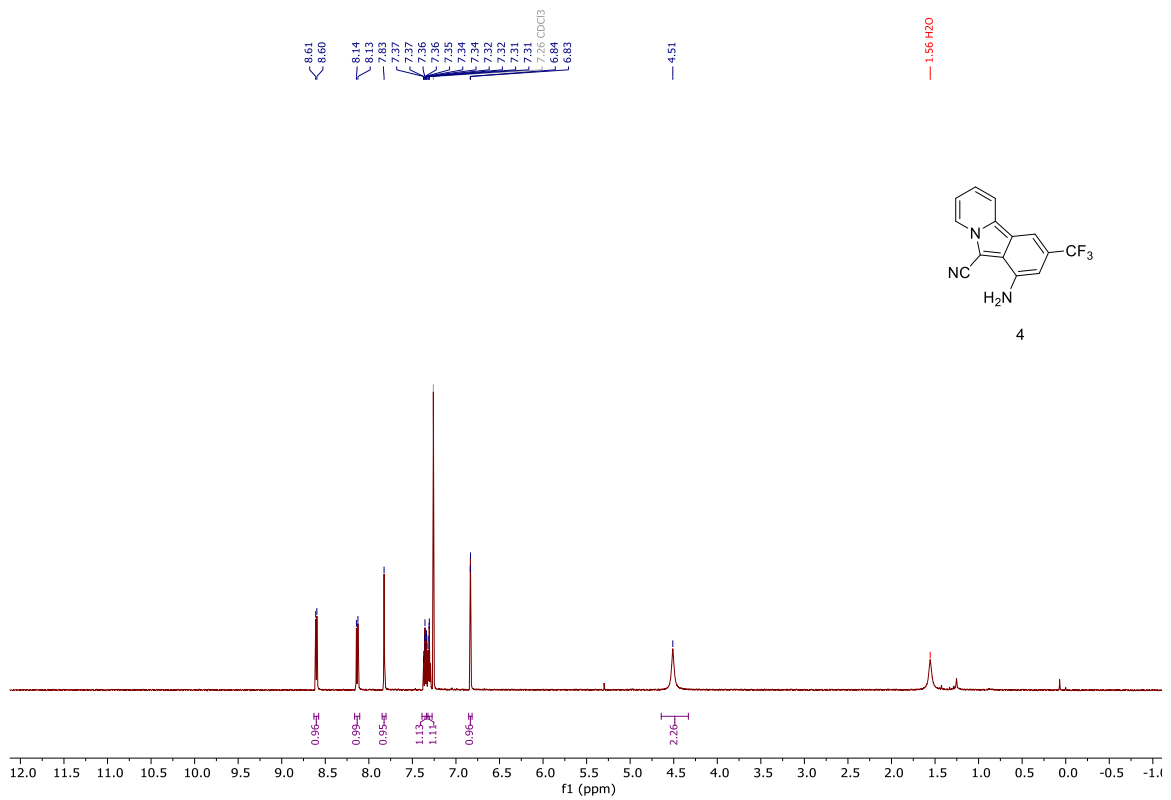

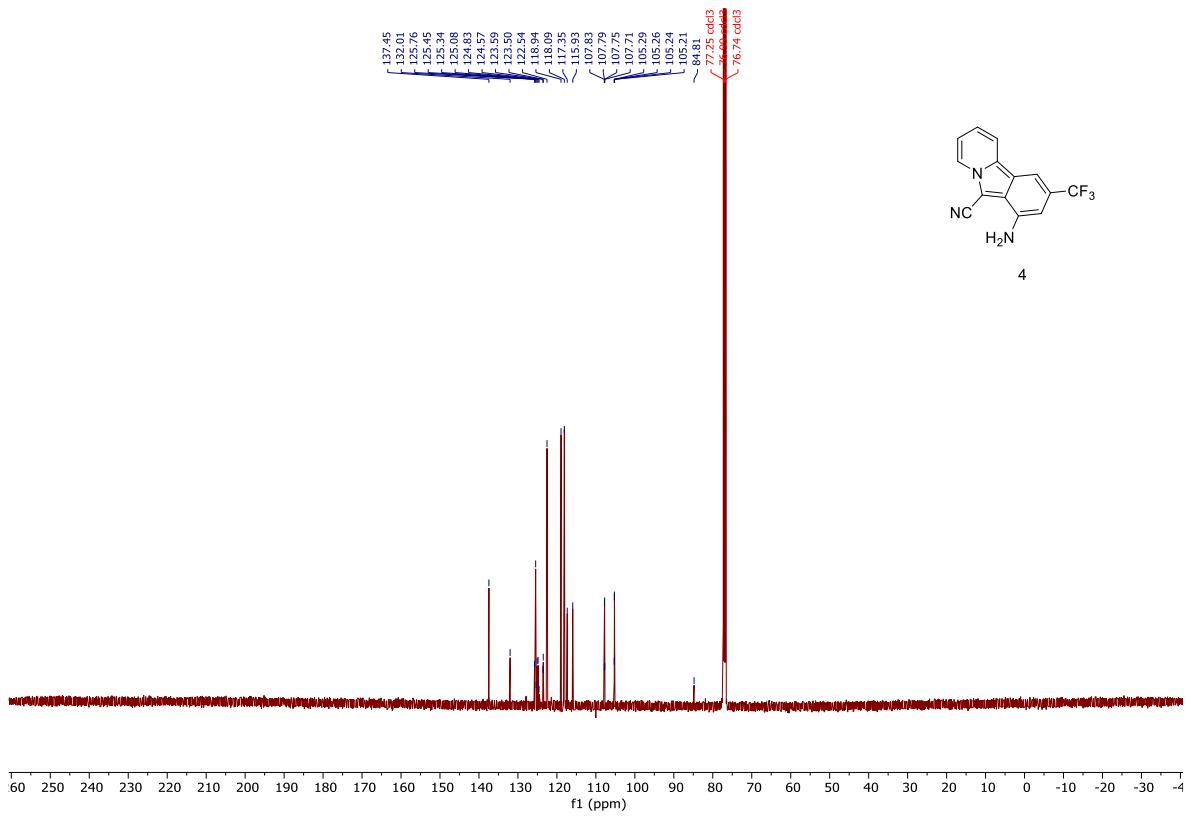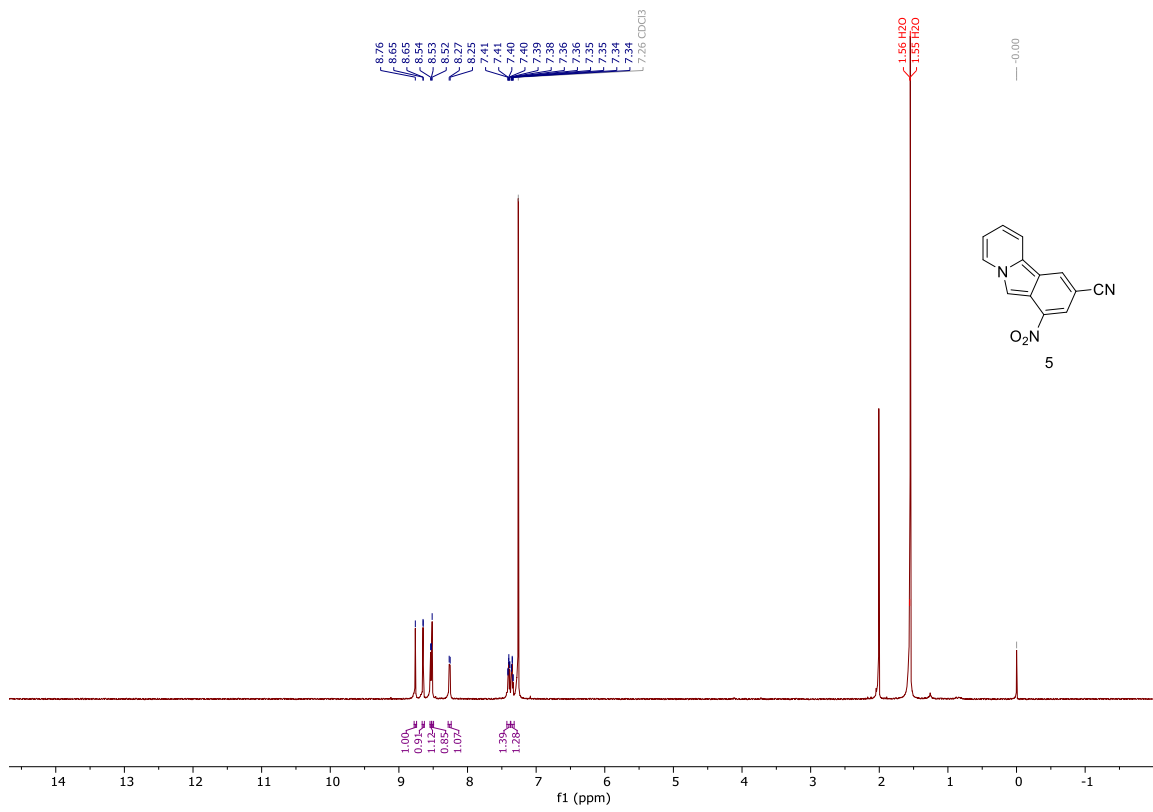



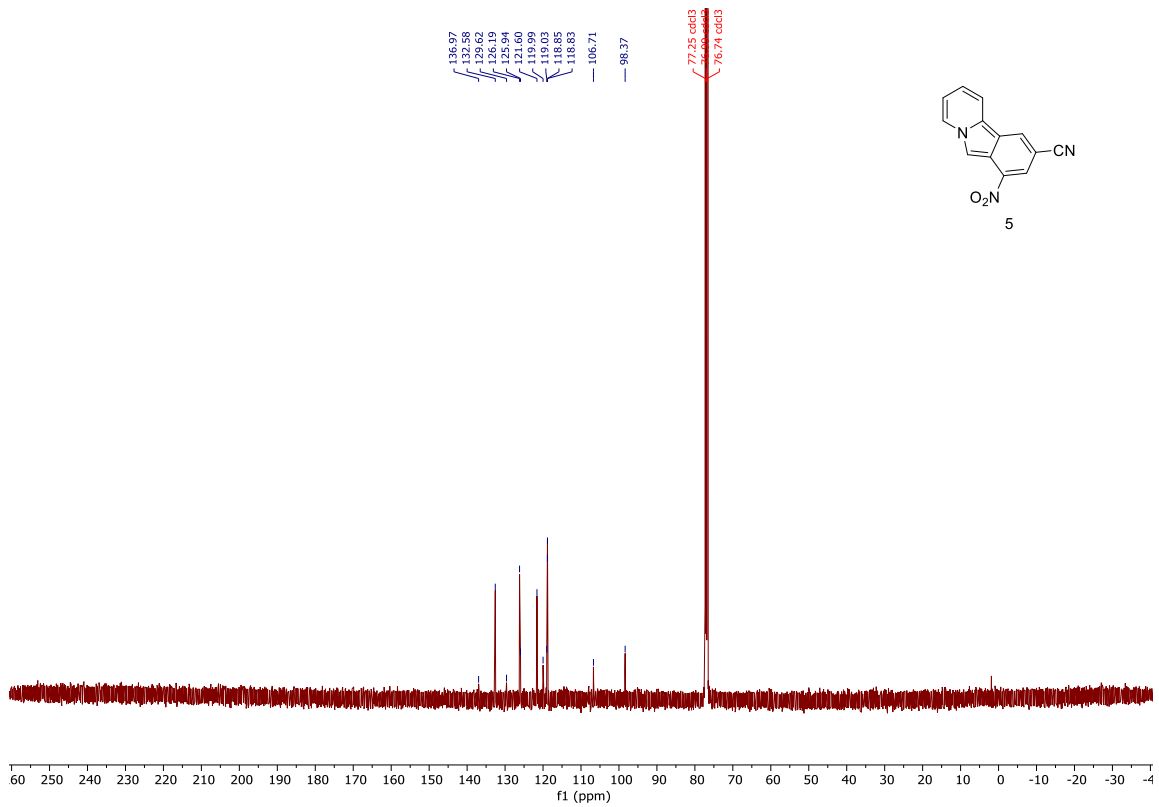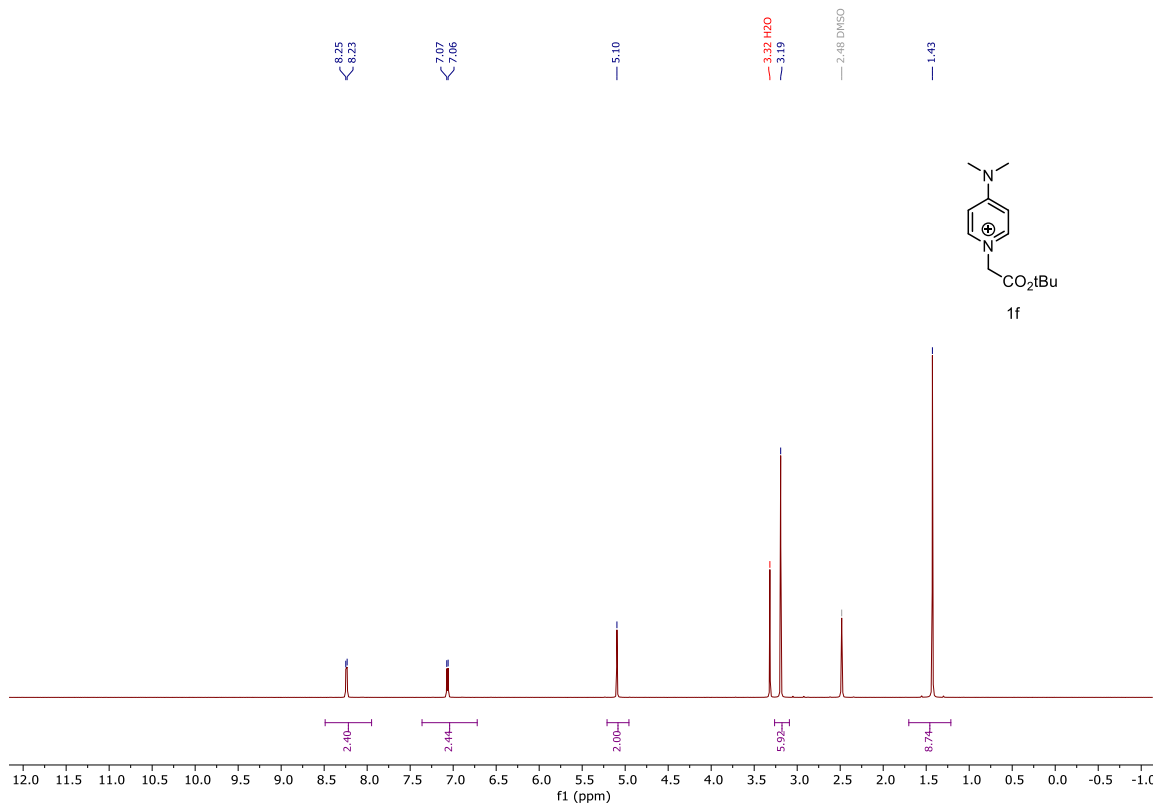

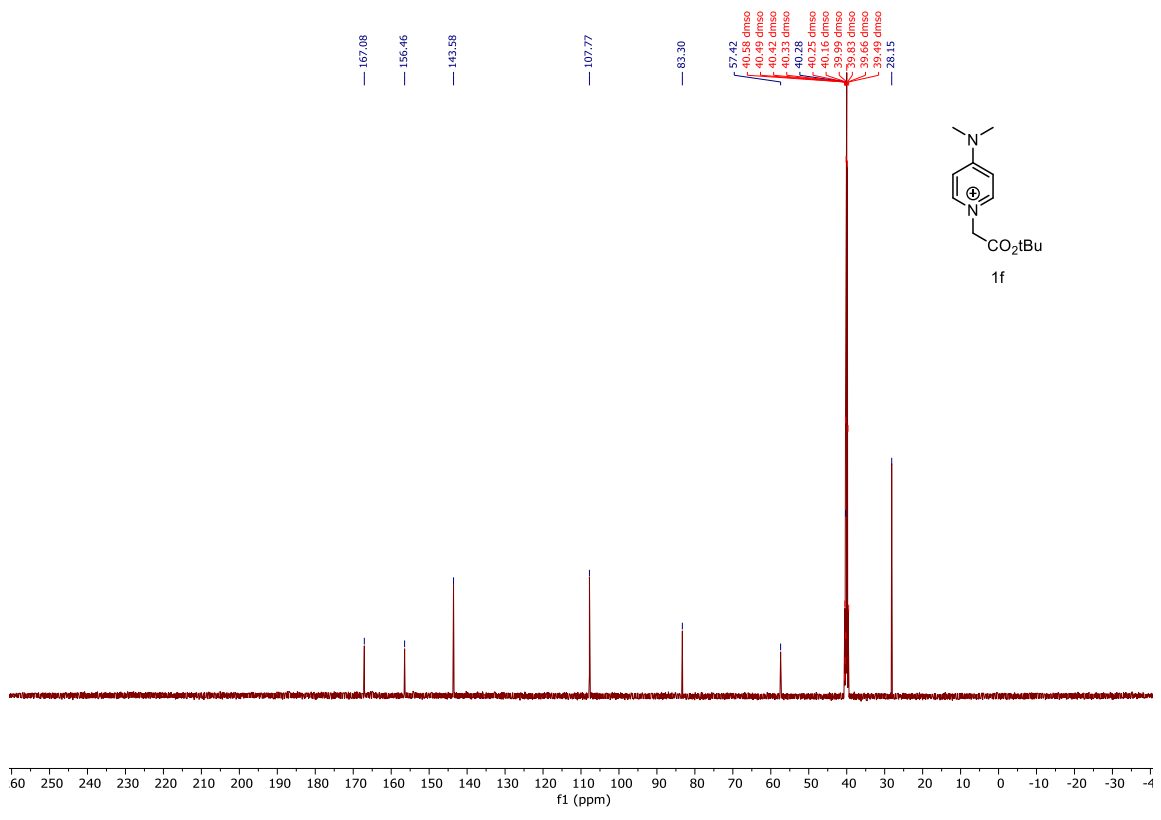

Supplement: d2qo00097k1.pdf [file d2qo00097k1.pdf]
